# 1 **Aberrant fast spiking interneuronal activity precedes seizure transitions in** 2 **humans**

3 Edward M. Merricks<sup>1</sup>✉, Sarita S. Deshpande<sup>2,3,4</sup>, Alexander H. Agopyan-Miu<sup>5</sup>, Elliot H. Smith<sup>1,6</sup>,  
4 Emily D. Schlafly<sup>7</sup>, Guy M. McKhann II<sup>5</sup>, Robert R. Goodman<sup>8</sup>, Sameer A. Sheth<sup>9</sup>, Bradley Greger<sup>10</sup>,  
5 Paul A. House<sup>11</sup>, Emad N. Eskandar<sup>12</sup>, Joseph R. Madsen<sup>13,14</sup>, Sydney S. Cash<sup>15</sup>,  
6 Andrew J. Trevelyan<sup>16</sup>, Wim van Drongelen<sup>3,4,17</sup>, Catherine A. Schevon<sup>1</sup>✉

7 <sup>1</sup> Department of Neurology, Columbia University Medical Center, New York, NY 10032  
8 <sup>2</sup> Medical Scientist Training Program, University of Chicago, Chicago, IL 60637  
9 <sup>3</sup> Committee on Neurobiology, University of Chicago, Chicago, IL 60637  
10 <sup>4</sup> Section of Pediatric Neurology, University of Chicago, Chicago, IL 60637  
11 <sup>5</sup> Department of Neurological Surgery, Columbia University Medical Center, New York, NY 10032  
12 <sup>6</sup> Department of Neurosurgery, University of Utah, Salt Lake City, UT 84132  
13 <sup>7</sup> Graduate Program in Neuroscience, Boston University, Boston, MA 02215  
14 <sup>8</sup> Department of Neurosurgery, Hackensack Meridian School of Medicine, Nutley, NJ 07110  
15 <sup>9</sup> Department of Neurosurgery, Baylor College of Medicine, Houston, TX 77030  
16 <sup>10</sup> School of Biology and Health Systems Engineering, Arizona State University, Tempe, AZ 85287  
17 <sup>11</sup> Intermountain Healthcare, Murray, UT 84107  
18 <sup>12</sup> Department of Neurological Surgery, Montefiore Medical Center, Bronx, NY 10461  
19 <sup>13</sup> Department of Neurosurgery, Massachusetts General Hospital & Harvard Medical School, Boston, MA 02114  
20 <sup>14</sup> Department of Neurosurgery, Brigham and Women's Hospital & Harvard Medical School, Boston, MA 02115  
21 <sup>15</sup> Department of Neurology, Massachusetts General Hospital & Harvard Medical School, Boston, MA 02114  
22 <sup>16</sup> Newcastle University Biosciences Institute, Newcastle upon Tyne, United Kingdom, NE2 4HH  
23 <sup>17</sup> Committee on Computational Neuroscience, University of Chicago, Chicago, IL 60637

24 ✉ e-mail: em3217@cumc.columbia.edu (EMM); cas2044@cumc.columbia.edu (CAS)

## 25 **Abstract**

26 There is active debate regarding how GABAergic function changes during seizure initiation and  
27 propagation, and whether interneuronal activity drives or impedes the pathophysiology. Here, we  
28 track cell-type specific firing during spontaneous human seizures to identify neocortical  
29 mechanisms of inhibitory failure. Fast-spiking interneuron activity was maximal over 1 second  
30 before equivalent excitatory increases, and showed transitions to out-of-phase firing prior to local  
31 tissue becoming incorporated into the seizure-driving territory. Using computational modeling, we  
32 linked this observation to transient saturation block as a precursor to seizure invasion, as supported  
33 by multiple lines of evidence in the patient data. We propose that *transient* blocking of inhibitory  
34 firing due to selective fast-spiking interneuron saturation—resulting from intense excitatory synaptic  
35 drive—is a novel mechanism that contributes to inhibitory failure, allowing seizure propagation.

## 36 Introduction

37 Anti-seizure medication is unsuccessful in close to a third of epilepsy patients, resulting in uncontrolled  
38 seizures in nearly 20 million people worldwide<sup>1</sup>. Understanding the underlying mechanisms of seizure  
39 generation and subsequent spread through cortex is vitally important for efforts to improve management  
40 of epilepsy. At its most basic level, seizures are sometimes characterized in terms of an imbalance  
41 between excitatory and inhibitory activity, but recent research has highlighted a more nuanced view<sup>2,3</sup>,  
42 focusing instead on positive and negative feedbacks within the network<sup>4,5</sup>. Particular attention has  
43 focused on whether usually inhibitory interneurons may paradoxically excite their postsynaptic targets  
44 under certain conditions<sup>6–11</sup> and even initiate the seizures themselves, possibly through pathologically re-  
45 wired networks<sup>2,12,13</sup> or as a result of rebound excitation after synchronous inhibitory activity<sup>14–16</sup>.

46 A longstanding hallmark of epileptic physiology is that of surround inhibition, in which the intense synaptic  
47 drive arising from a seizure nearby is restrained by feedforward inhibitory activity in the surrounding  
48 “penumbral” territory<sup>17–20</sup>. Direct evidence for this mechanism has been well-established in animal  
49 models<sup>21–25</sup>, and neuronal firing patterns indicative of its presence have been shown in human recordings,  
50 albeit without direct assay of inhibition<sup>26–28</sup>.

51 As a result, both increases<sup>14–16,29–31</sup> and decreases<sup>32–34</sup> in interneuronal firing have been theorized to  
52 underlie seizure onset and spread. A dynamic interplay between the successful inhibitory restraint and  
53 its subsequent failure, allowing the seizure to propagate, may suggest that both mechanisms coexist to  
54 varying degrees in naturally occurring seizures<sup>2,35</sup>. However, the exact mechanism by which the inhibitory  
55 surround fails remains unresolved, impeding the identification of potential therapies. This collapse could  
56 be mediated either by the interneurons themselves becoming overwhelmed, or due to their own activity  
57 overwhelming the postsynaptic cells. For example, depolarization block could result in interneurons  
58 ceasing to fire<sup>24,32,36,37</sup>. Alternatively, increases in postsynaptic intracellular chloride ion  
59 concentration<sup>2,7,9,38</sup> or extracellular potassium ion concentration<sup>2,39,40</sup> could result in weakened  
60 interneuronal efficacy or even result in excitatory effects. Furthermore, recent animal work has posited  
61 that the failure may arise due to reorganization of activity in specific inhibitory cell-types rather than either  
62 of the aforementioned pre- and post-synaptic alterations<sup>41</sup>.

63 Experimental models have helped considerably in teasing apart these mechanisms, however there are  
64 likely many paths to ictogenesis, and being able to elicit seizures experimentally does not necessarily  
65 equate to uncovering specific mechanisms during unprovoked human focal seizures. In particular, the  
66 role of interneuronal activity during the pathological spread of naturally occurring epileptic activity remains  
67 a complex and open question. To this end, here we analyzed microelectrode recordings during  
68 spontaneous neocortical seizures in patients undergoing presurgical monitoring for focal epilepsy,

69 enabling examination of the spatiotemporal activity patterns of populations of individual neurons, grouped  
 70 by their putative cell types, and contextualized their firing patterns with a computational model.

## 71 Results

### 72 Neocortical seizure involvement is defined by transient increases in interneuronal firing 73 rate

74 Spontaneous seizures captured on microelectrode array (MEA) recordings from thirteen patients were  
 75 analyzed, up to a maximum of three per patient (Table S1). MEAs were arranged in a 10 x 10 grid over  
 76 4 x 4 mm with either 1- or 1.5-mm length electrodes, and implanted into the presumptive seizure onset  
 77 zone in neocortical gyri. 4,222 single units were isolated across 33 seizures (mean  $\pm$  SD per seizure:  
 78  $127.9 \pm 67.7$ ), with 11.98% of units being probabilistically subclassified as inhibitory interneurons<sup>42</sup> (see  
 79 Methods). The numbers of cells belonging to each classification was robust, with the putative inhibitory  
 80 population dropping only by 3.84% when restricting to a high confidence threshold of 95% (Fig. 1).

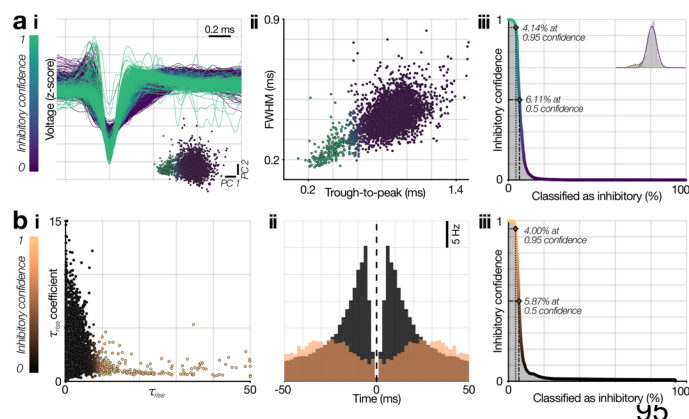

**Figure 1. Cell-type subclassification of single-units.** (a) Probabilistic subclassification of fast-spiking (FS) interneurons. (i) Mean wideband waveforms from each single-unit, color-coded by its confidence of being classified as inhibitory based on a 2-component Gaussian mixture model fitted to these waveforms' scores in PC space (inset; color-scale maintained throughout A). (ii) Confidences from this model showed the expected differences in spike duration in the putative FS interneuron population, and classification proved stable, with similar percentages of units being classified as FS interneurons across a wide range of confidence cutoffs (iii; inset: Fisher-linear discriminant projection of the 2-component Gaussian-mixture model). (b) Probabilistic subclassification of excitatory cells. (i) The autocorrelograms for each unit that was not classified as a

96 putative FS cell were fitted with a set of exponentials to calculate  $\tau_{\text{rise}}$  (Petersen et al., 2020;<sup>81</sup> see Methods), which were then  
 97 fitted with a 2-component Gaussian mixture model to derive confidences of each unit being excitatory or inhibitory (black to  
 98 copper color scale; maintained throughout b). (ii) Mean autocorrelograms for wide single-units with  $> 50\%$  and  $\leq 50\%$   
 99 confidence of being inhibitory based on firing patterns (copper and black respectively). (iii) As for putative FS interneuron classification,  
 100 the probabilistic classification of the remaining excitatory versus inhibitory population proved stable, with similar percentages of units  
 101 being classified across a wide range of confidence cutoffs.

102 Clinical macro-electrodes are dominated by synaptic activity as opposed to local neuronal firing<sup>43</sup>, and so  
 103 primarily show the *input* to the local tissue. As a result, ictal patterns on the EEG are not sufficient to  
 104 determine if a region has been recruited into seizure-driving territory (the spatiotemporally dynamic ictal  
 105 “core”) or if intact inhibition is successfully restraining the intense excitatory drive at that moment  
 106 (“penumbra”)<sup>22,26,44</sup>. We have previously shown that a wavefront of continuous (“tonic”) firing occurs at  
 107 the boundary when penumbral tissue becomes recruited<sup>26,28,45–47</sup> and that individual neurons undergo  
 108 action potential waveform alterations upon recruitment<sup>28,42,44</sup>. This activity is spatially restricted, with these  
 109 firing patterns coexisting within seizures, marking the propagation of ictal activity (Fig. 2). A sustained,  
 110 significant increase in firing rate therefore defined the moment of local recruitment at individual

111 electrodes<sup>45</sup> (see Methods for description of quantitative criteria), and ictal recordings without this  
112 signature activity were classified as unrecruited.

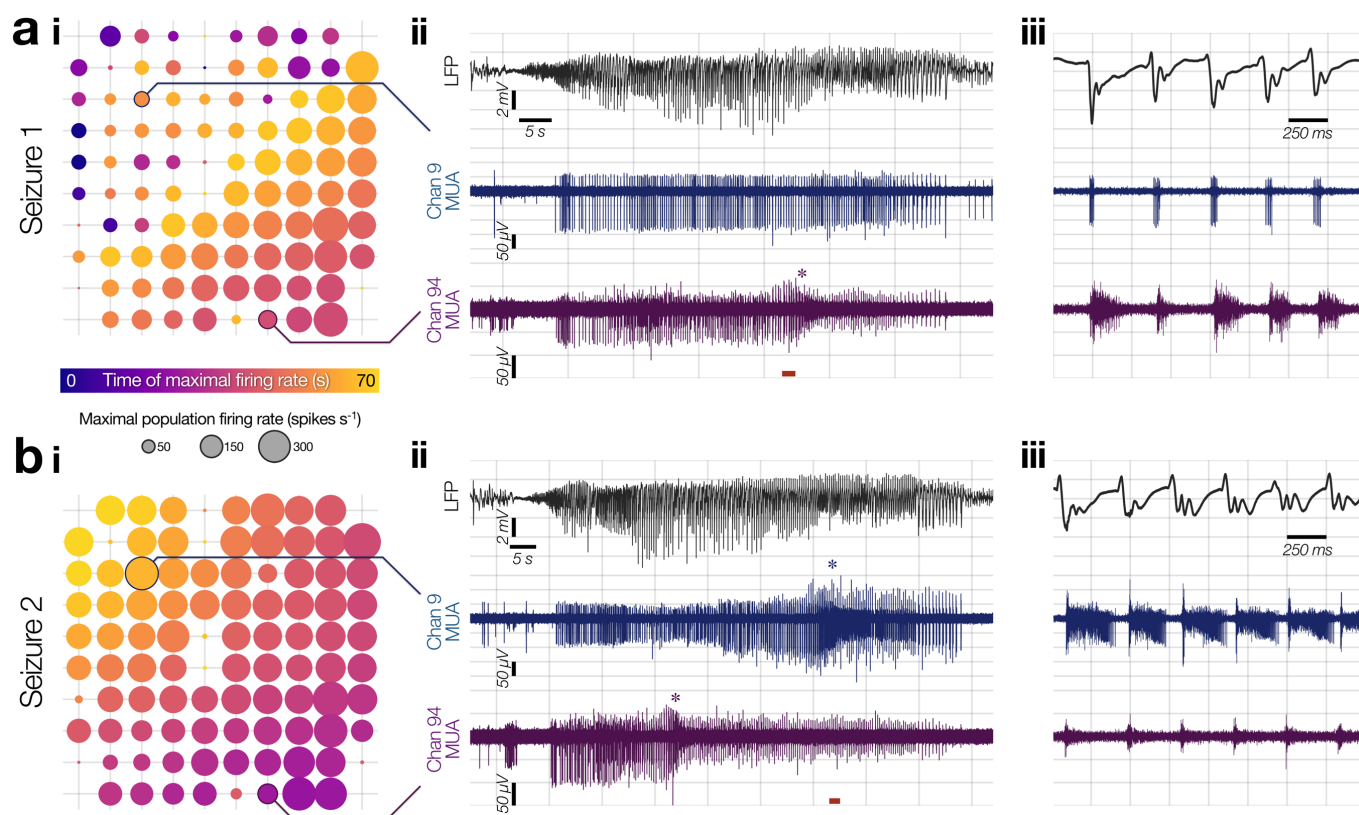

113

114 **Figure 2. Spatiotemporal dynamics of ictal recruitment across the MEA.** (a, b) Consecutive seizures captured 5.5 hours  
115 apart (Patient 7, seizures 1 & 2). (i) Firing rate spatiotemporal patterns during the seizure: each circle corresponds to a single  
116 MEA electrode, where its size denotes the maximal population firing rate that occurred at that electrode during the seizure, and  
117 its color shows when that maximal firing occurred. Note the maintained propagation direction (color-scale, running from bottom  
118 right to top left) across both seizures, but the sharp diagonal in the maximal firing rate during the first seizure, showing the outer  
119 boundary of ictal recruitment before the seizure terminated in seizure 1 while it successfully propagated across the whole array  
120 in seizure 2. (ii) Mean LFP (2–50 Hz bandpass) from the whole MEA (top) with paired MUA (300 Hz–5 kHz bandpass) from  
121 example channels highlighted in i (below). Asterisks show the timing of local recruitment at that electrode (i.e., when local  
122 neurons become involved in *driving* the seizure rather than simply being impacted by the excitatory barrages from elsewhere,  
123 see Methods): note the absence of recruitment in channel 9 in seizure 1, and the temporal relationship between recruitment in  
124 channels 9 and 94 in seizure 2, in alignment with the extent of ictal propagation seen in i. The epoch between “global” seizure  
125 onset (earliest evidence of ictal activity in the LFP) and local recruitment is denoted “pre-recruitment” for that channel. (iii)  
126 Enlargement of the short epochs marked with red bars in ii, highlighting, in a, a moment when channel 94 is becoming recruited  
127 to the seizure while channel 9 (~3.2 mm away) remains unrecruited in seizure 1, and in b, when channel 94 has been recruited  
128 and the seizure core has now reached channel 9, in seizure 2.

129 Note “local” recruitment timing differs from the first EEG changes (“global” seizure onset) since it takes  
130 into account how slowly seizures propagate, largely due to delays that can be attributed to a powerful  
131 inhibitory restraint. For each seizure, therefore, the timing of *global* onset is a single time point—when  
132 the seizure has started but most tissue remains penumbral—while the timing of *local* recruitment varies  
133 across sites (Fig. 3). The transition to pathological activity must occur between these points, with the  
134 timing of local recruitment being critical. However, human studies to date have focused on inhibitory  
135 activity aligned to global onset, with local recruitment remaining uncertain. We therefore sought to  
136 characterize firing patterns with respect to the moment of local recruitment.

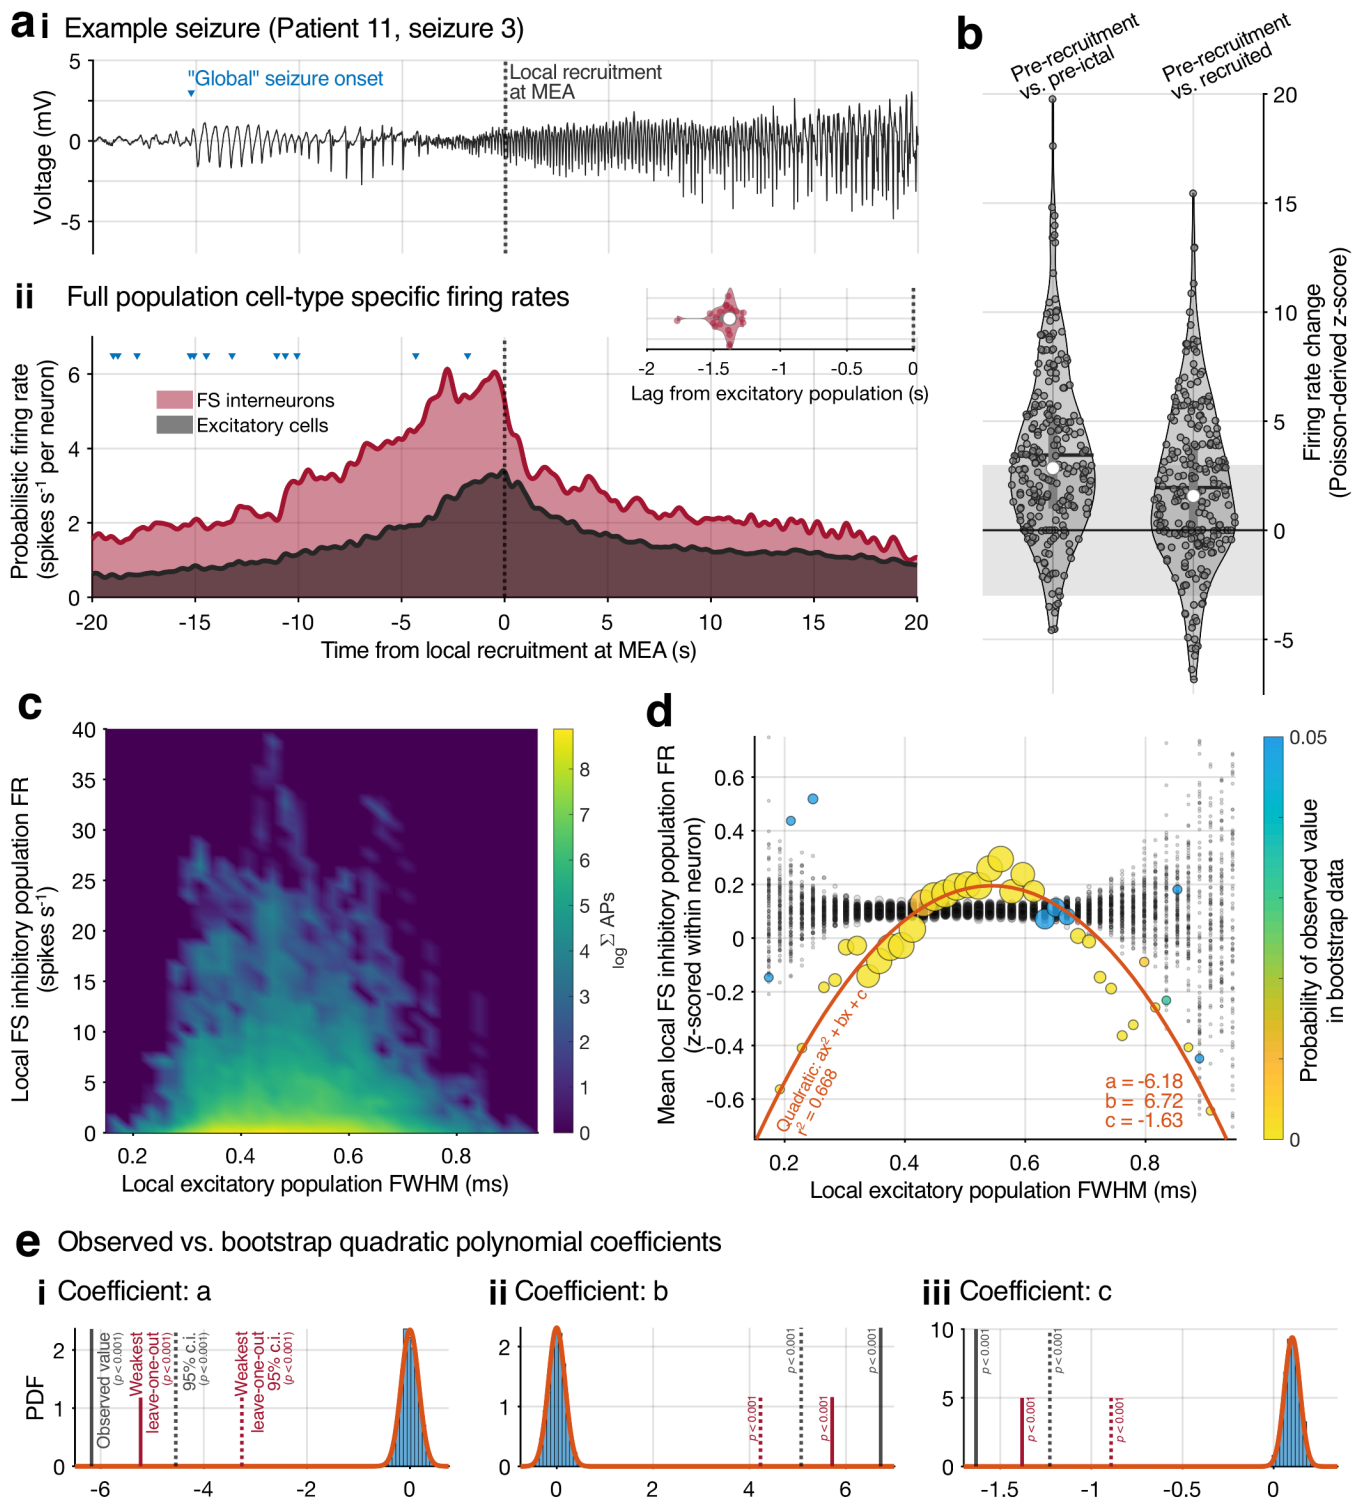

137

138 **Figure 3. Firing rate patterns with respect to local ictal recruitment.** (a) LFP (2–50 Hz bandpass) from an example seizure,  
 139 showing global onset (blue triangle) and the average moment of local recruitment at the MEA (dotted line, *i*), with paired  
 140 population firing rate data from all seizures aligned to the average moment of local recruitment at the MEA (*ii*), for fast-spiking  
 141 (FS) interneurons and excitatory cells (red and black respectively). Blue triangles show global onset for individual seizures. Note  
 142 the increase in FS interneuronal preceding local recruitment, when excitatory firing peaks. This > 1 second precession is stable  
 143 across a leave-one-out analysis (lag at maximal cross correlation between populations, inset). (b) Poisson-derived z-scored  
 144 firing rate changes for FS interneurons between the pre-recruitment epoch and the pre-ictal 30 seconds (left) and the post-  
 145 recruitment epoch (right; in each, mean: black line; median: white dots; individual FS interneurons: gray dots). (c) Heatmap of  
 146 FS interneuron firing rates across all seizures as a function of the excitatory population's spike full-width at half maxima (FWHM)  
 147 at the same electrode—a metric of local ictal recruitment—showing an increase followed by decrease in population firing rates.  
 148 (d) Equivalent to c, but with normalized FS interneuron firing rates (colored dots; z-scored within each neuron) [cont'd overleaf]

149 [cont'd from previous page] and bootstrap results from repeat runs while shuffling the order of the data within each neuron to  
150 create null distributions (black dots). Diameter of each dot corresponds to the total number of observations in the original data,  
151 which was maintained during the bootstrap analysis. Color scale shows probability of the observed data in the null distributions.  
152 Orange line: polynomial fit to the observed data. (e) Coefficients from the polynomial fit to: the observed data (solid black lines;  
153 95% confidence in dotted black lines); the weakest results from the observed data during a leave-one-out analysis (red lines);  
154 and the distribution of values and a gaussian fit for the bootstrap data (blue histogram and orange line respectively).  $P < 0.001$   
155 in all observed scenarios.

156 Seizures that included evidence of recruitment at the recorded location (27 seizures from 11 patients;  
157 Table S1) showed a stereotyped, transient increase in inhibitory firing after global seizure onset and prior  
158 to the excitatory increase at local recruitment (the “pre-recruitment” epoch; Fig. 3a). Across the full  
159 population, this inhibitory activity occurred 1.40 seconds before excitatory increases (cross-correlation  
160 analysis,  $r$ -squared = 0.984; Fig. 3a ii inset) and was similar across all seizures (leave-one-out analysis,  
161 mean  $\pm$  SD: lag =  $1.41 \pm 0.098$  s;  $r$ -squared =  $0.983 \pm 0.0014$ ). For individual FS interneurons, the  
162 transient increase in firing rate during pre-recruitment was larger than pre-ictal levels in the majority of  
163 cells (Fig. 3b; pre-ictal mean  $\pm$  SD:  $0.86 \pm 1.25$  spikes  $s^{-1}$ ; pre-recruitment:  $3.39 \pm 4.19$  spikes  $s^{-1}$ ;  $P =$   
164  $9.09 \times 10^{-22}$ , Mann-Whitney U test; increases in 82.8% of FS interneurons) and similarly larger than firing  
165 post-recruitment until seizure termination (Fig. 3b; mean  $\pm$  SD firing rate:  $1.80 \pm 3.11$  spikes  $s^{-1}$ ;  $P = 1.09$   
166  $\times 10^{-6}$ , Mann-Whitney U test; increases in 67.2% of FS interneurons). While increases were largest after  
167 global onset and prior to local recruitment, recruitment was not associated with reductions in inhibitory  
168 firing, with increases over baseline in 193 of 248 of FS interneurons (77.8%) and only 8 (3.2%) showing  
169 complete cessation of firing (6 in patient 8, seizure 1, 1 in patient 5, seizure 2 and 1 in patient 9, seizure  
170 1).

171 Due to this firing rate increase after global onset but *before* local recruitment, we hypothesized that it was  
172 primarily caused by feedforward inhibition from the approaching ictal wavefront<sup>22,23,26</sup>, which *in vitro*  
173 animal models have suggested is mediated first by parvalbumin-positive (PV<sup>+</sup>) interneurons<sup>25,41</sup>, which  
174 have been shown to primarily consist of fast-spiking (FS; Fig. 1a) cells<sup>48,49</sup>. We therefore analyzed the  
175 firing response of this FS population as a function of spike full-width at half maximum (FWHM) of all other  
176 cells recorded at the same electrode (Fig. 3c, d). We previously showed how spike FWHM is a suitable  
177 indicator for ictal recruitment at the level of single neurons<sup>28</sup>; it therefore provides the opportunity to  
178 quantify the degree to which a region has been impacted, continuously.

179 In keeping with the model of feedforward inhibition ahead of the ictal wavefront that subsequently  
180 collapses, FS interneuronal firing rates showed a clear “inverted U” response as the excitatory cells  
181 surrounding them displayed increasing FWHM values (Fig. 3c). This response of increasing inhibitory  
182 firing rates followed by a collapse as the surrounding tissue underwent larger waveform alterations, was  
183 robustly modeled with a simple quadratic fit ( $r$ -square = 0.668; Fig. 3d). Comparison to a null dataset—  
184 created by shuffling the firing rate values at random 1,000 times and re-fitting the data—confirmed the  
185 negative quadratic was unlikely to arise by chance ( $P < 0.001$  in each coefficient, Holm-Bonferroni  
186 corrected; Fig. 3e). Similarly, a leave-one-out analysis confirmed the response was stable across

187 seizures, with the most conservative estimates still significantly removed from the null dataset ( $P < 0.001$   
188 in each; Fig. 3e).

189 This firing pattern can be seen clearly in patient 7's two consecutive seizures, where the first propagated  
190 across only half the MEA, before terminating, and the second successfully propagated across the entire  
191 MEA (Fig. 2). These two contrasting seizures thus provided an opportunity to compare neuronal behavior  
192 first, between recruited versus unrecruited tissue simultaneously recorded on the same array in the first  
193 seizure, and second, of the same cortical territory being unrecruited and then recruited across  
194 subsequent seizures, thereby demonstrating the variable extent of ictal recruitment from one seizure to  
195 the next. These recordings emphasize the spatial relationship of feedforward inhibition ahead of the  
196 propagating ictal wavefront with ramping up of each FS unit's firing starting at global onset, and increasing  
197 as the seizure propagates closer, before subsiding as the local tissue becomes recruited (Supplementary  
198 Movies 1 & 2). This in itself, of course, is not indicative of whether FS interneuron firing rate reduction is  
199 causative of local recruitment, or a result of the pathological activity. To further explore this relationship,  
200 we turned to analysis of rhythmic onset seizures specifically to be able to relate cell-type specific neuronal  
201 firing to repetitive ictal discharges<sup>50</sup>.

## 202 **Out-of-phase FS interneuron activity in rhythmic onset seizures**

203 A subset of 18 seizures from eight patients showed rhythmic onset patterns ( $> 2.5$  SD increase of power  
204 in either delta, theta or alpha bands before ictal recruitment; Table S1). These seizures allowed the  
205 opportunity to analyze inhibitory firing patterns from ictal onset through local recruitment with respect to  
206 the dominant ictal rhythm, while the higher frequencies in low-voltage fast onsets preclude correlating  
207 neuronal firing to ictal discharges. Prior to recruitment, ictal discharges were accompanied with entrained  
208 neuronal firing across both excitatory and inhibitory cells ( $P < 0.001$  in each, across all seizures, Rayleigh  
209 z-test; Fig. 4a).

210 Ahead of the invasion of the ictal wavefront, however, FS interneuronal bursts were seen to slip out-of-  
211 phase both from the ECoG signal and from the remainder of the neuronal population (Fig. 4b), suggesting  
212 a pathological mechanism altering firing burst patterns as opposed to a simple disruption to interneuronal  
213 firing. In the 5 seconds before recruitment there was an increase in the circular distance between the FS  
214 interneuron and pyramidal cell population phases ( $P = 2.63 \times 10^{-83}$ , Mann-Whitney U test). This shift in  
215 entrainment was echoed at the individual seizure level, with significant differences in the cell-type specific  
216 phase distributions in each seizure ( $P < 0.05$  in each, range:  $P = 0.002$ – $0.018$ , Holm-Bonferroni corrected  
217 Kuiper test).

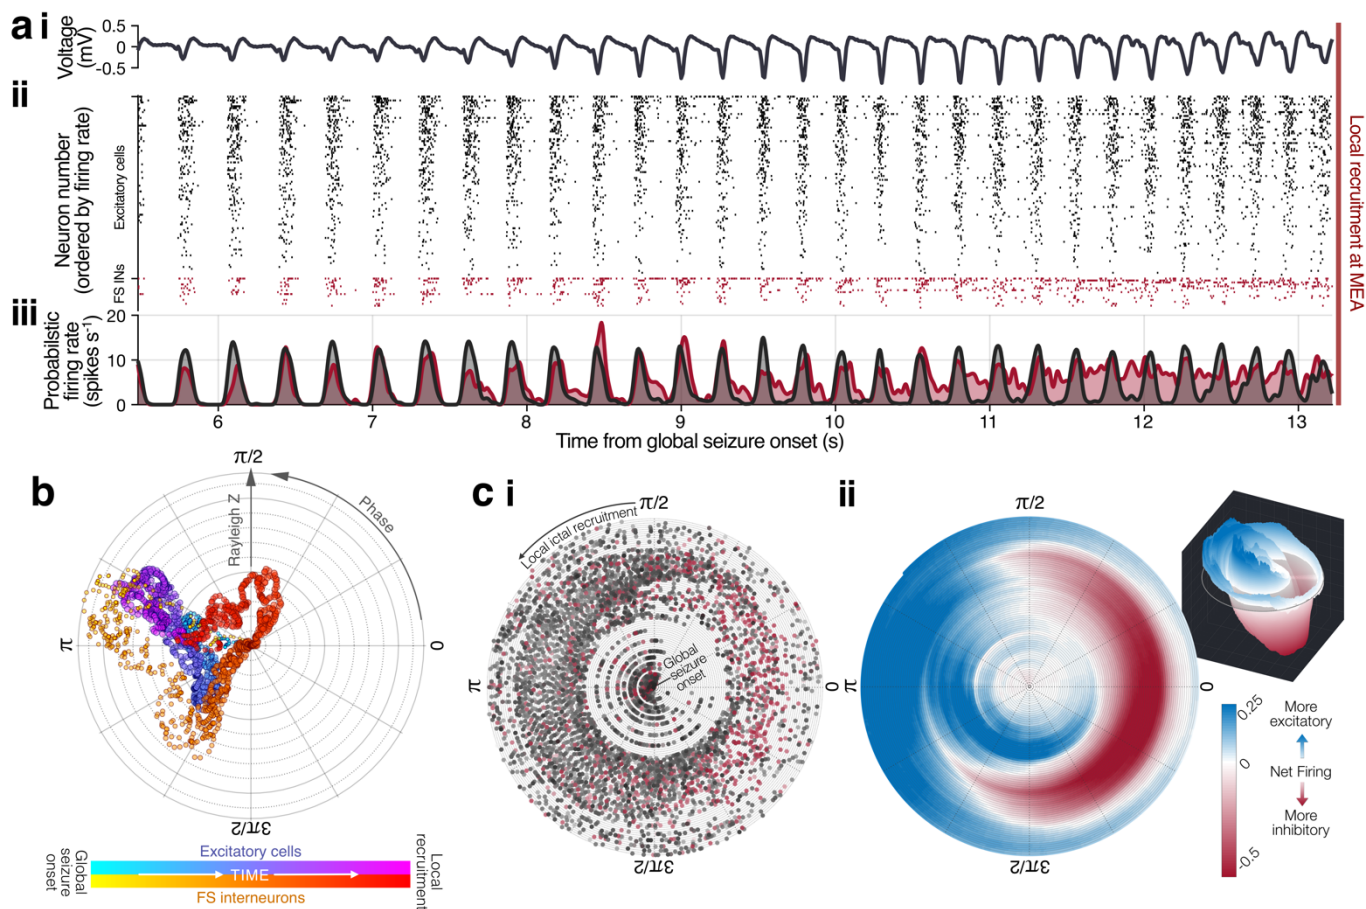

218

219 **Figure 4. Cell-type specific differences in the lead-up to local ictal recruitment.** (a) Activity in the lead-up to local recruitment  
 220 for an example rhythmic onset seizure (Patient 3, seizure 1). (i–iii) Mean LFP across the array (2–50 Hz bandpass), raster plot  
 221 for all isolated neurons (red: FS interneurons; black: all other cells), and gaussian-convolved probabilistic firing rate for the FS  
 222 interneuron and excitatory cell populations (red and black respectively). (b) Mean phase entrainment through time (2 second  
 223 bins, advancing in 10 millisecond increments) for FS interneuron and excitatory cell populations in the pre-recruitment epoch for  
 224 the same seizure shown in a. Angles show mean phase direction, radius shows level of instantaneous entrainment to the  
 225 dominant ictal rhythm (Rayleigh z value, normalized within cell-type), dot diameters are scaled by the total number of action  
 226 potentials contributing to that bin. Note the transition of the FS interneuron population to anti-phase firing before recruitment. (c)  
 227 Same epoch as b, showing all action potentials across the population through time on a spiral, revealing the temporal evolution  
 228 of the phase angles (i). Each dot is one action potential (red: FS interneuron; black: excitatory cell; saturation is the confidence  
 229 that action potential arose from its assigned neuron). The location of each dot represents both the progression of time as the  
 230 radius of the spiral expands, and the instantaneous phase of the dominant ictal rhythm at that time as the angle. (ii) Calculating  
 231 the gaussian-convolved firing rates for the two populations across the spiral (see Methods) and subtracting the inhibitory from  
 232 the excitatory gives an instantaneous estimate of inhibitory versus excitatory firing (color-scale; three-dimensional view inset),  
 233 thereby characterizing the spatiotemporal dynamics of the neuronal firing with respect to the dominant ictal rhythm.

234 To quantify and to visualize the spatiotemporal dynamics of this cell-type specific transformation, we  
 235 analyzed firing patterns with respect both to instantaneous phase and ictal time simultaneously (Fig. 4c).  
 236 Each rhythmic onset seizure showed periods of anti-phase FS interneuron-dominant firing prior to local  
 237 ictal recruitment (Fig. 5). At the population level, inhibitory firing lagged the peak of the excitatory firing  
 238 (Fig. 5a;  $P < 0.001$ , Kuiper-test). While the exact phase of this inhibitory firing with respect to the dominant  
 239 ictal rhythm differed across patients (circular mean  $\pm$  SD:  $239.0^\circ \pm 74.44^\circ$ ), it was similar between  
 240 seizures within each patient, with no measurable deviation from a von Mises distribution of equal  
 241 concentration centered on  $0^\circ$  (Fig. 5b; von Mises fit to observed data:  $\mu = -9.77^\circ$ ,  $\kappa = 0.65$ ;  $P = 0.987$ .  
 242 Similarly, there was no difference for a wide range of von Mises concentration parameters:  $P > 0.05$  for



243  $0 \leq \kappa < 1.5$ ). Each seizure was characterized by a relationship between the inhibitory firing and both the  
 244 phase of the dominant ictal rhythm (angle in Fig. 5c) and the progression of time (radius in Fig. 5c;  $P < 1$   
 245  $\times 10^{-8}$  in each, Holm-Bonferroni corrected multi-linear regression F-test). Thus, altered timing of  
 246 interneuron burst firing prior to local recruitment was ubiquitous among the 8 patients and 18 seizures  
 247 analyzed, and the firing pattern alteration was stereotypical for each patient.

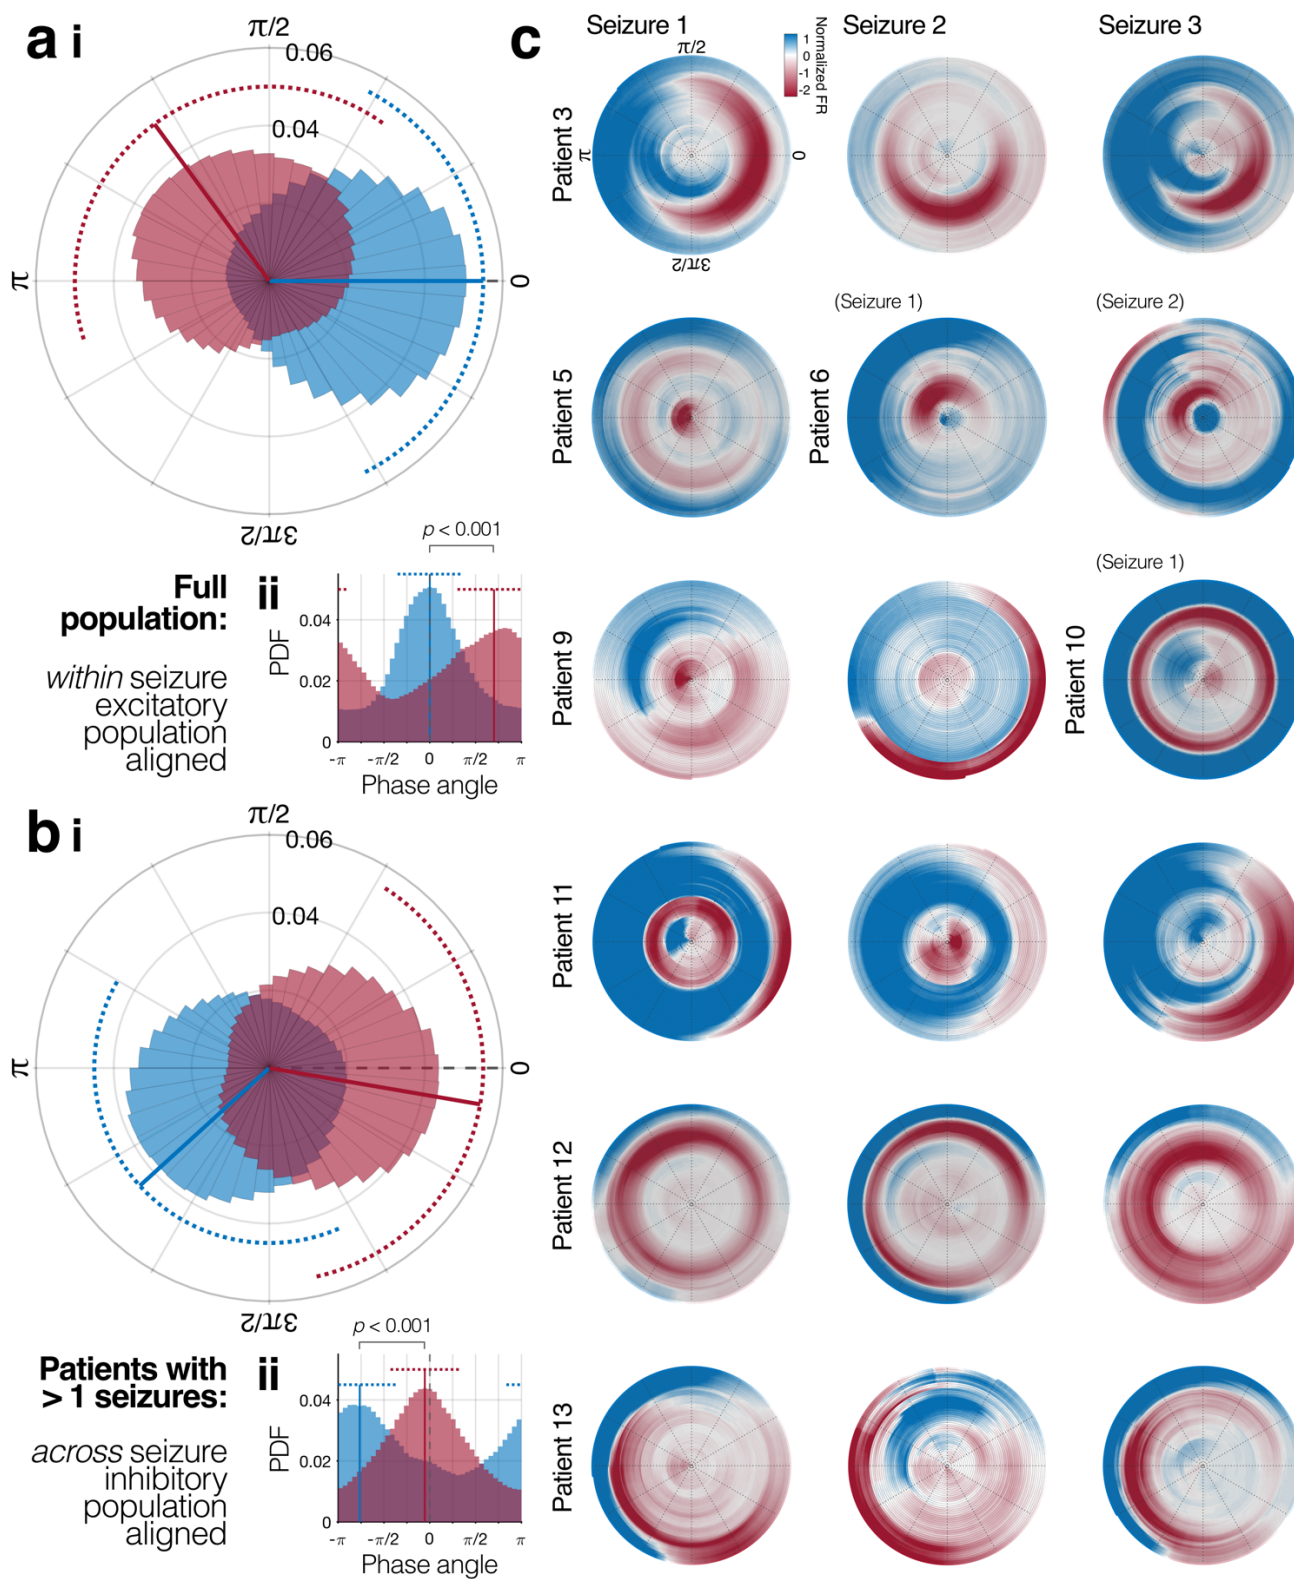

249 **Figure 5 (previous page). Out-of-phase inhibitory firing is a defining feature of rhythmic onset seizures.** (a)(i) Phase  
250 angles of the dominant ictal rhythm for all action potentials (red: FS interneurons; blue: excitatory cells) between global seizure  
251 onset and local recruitment at the MEA, across all rhythmic onset seizures, normalized to the circular mean of that seizure's  
252 excitatory population. Solid and dotted lines show circular mean and standard-deviation of each population respectively. (ii)  
253 Same data plotted in cartesian space. (b) Same as for a, but restricted to patients with multiple seizures ( $n = 16$  seizures, 6  
254 patients), and aligned instead to the circular mean angle of FS inhibitory firing across all seizures within that patient, revealing  
255 stable phase preferences across seizures within patient (pairwise distance of inhibitory phase angles within patients:  $40.15^\circ \pm$   
256  $29.64^\circ$ ; pairwise distance of inhibitory vs. excitatory phase angles within patients:  $98.12^\circ \pm 52.07^\circ$ ;  $P = 9.39 \times 10^{-5}$ , unpaired t-  
257 test). (c) Cell-type specific firing phase/time plots as per Fig. 4c for each rhythmic onset seizure.

## 258 **Transient depolarization block in FS interneurons gives way to ictal recruitment**

259 The change in phase angle in the 5 seconds leading into recruitment was accompanied by a shift to tonic  
260 firing exclusive to the FS interneuron population: while entrainment increased in pyramidal cells ( $P <$   
261  $0.001$ , Rayleigh z-test), it decreased in FS interneurons ( $P = 0.031$ , Rayleigh z-test). We hypothesized  
262 that this anti-phase FS interneuronal activity preceding local ictal recruitment is driven by the approaching  
263 seizure's ictal wavefront, which generates powerful excitatory synaptic currents that spread orders of  
264 magnitude faster than the speed of the ictal wavefront itself<sup>26,46,51,52</sup>. Under this hypothesis, PV<sup>+</sup>  
265 interneurons would be impacted prior to other cell types due to the combination of feedforward synaptic  
266 wiring<sup>53</sup> and their relatively small somata<sup>37</sup>. A defining feature of neurons that have been recruited to  
267 seizures is the paroxysmal depolarizing shift (PDS), which results in a loss of action potential  
268 amplitude<sup>28,54-57</sup>.

269 Analysis of the action potentials for individual putative FS interneurons revealed reduction in amplitude  
270 within the out-of-phase burst between ictal discharges, with a progressive loss of amplitude prior to local  
271 ictal recruitment (Fig. 6a). Averaging across all FS interneurons within a seizure, separated by  
272 consecutive discharges, revealed that not only did the mean amplitude decrease prior to recruitment, but  
273 decreased within each burst period, followed by a progressively smaller recovery in amplitude between  
274 discharges each time (Fig. 6b). Expanding this analysis across all rhythmic onset seizures revealed the  
275 same observations held true at the population level (Fig. 6c; z-scored amplitude change:  $-0.52 \text{ s}^{-1}$  and -  
276  $8.5 \times 10^{-3} \text{ s}^{-1}$  for intra- and inter-burst respectively;  $P < 0.001$  in each, linear regression F-test).

277 This pattern of loss of amplitude followed by decreasing levels of recovery between each burst was  
278 remarkably stable across all rhythmic onset seizures (Fig. 6d). On average, intra-burst loss of amplitude  
279 was  $-1.26 \pm 1.74 \text{ SD s}^{-1}$ , with 15 of 18 seizures (83.3%) showing a downward average trajectory across  
280 all FS interneurons through time. For individual FS interneurons, intra-burst loss of amplitude was  $-21.24$   
281  $\pm 35.11 \mu\text{V ms}^{-1}$ . These trajectories were a larger loss of amplitude than expected by chance, as  
282 compared to a bootstrapped null distribution derived from shuffling the temporal order of spikes 10,000  
283 times ( $P = 1.48 \times 10^{-16}$ ).

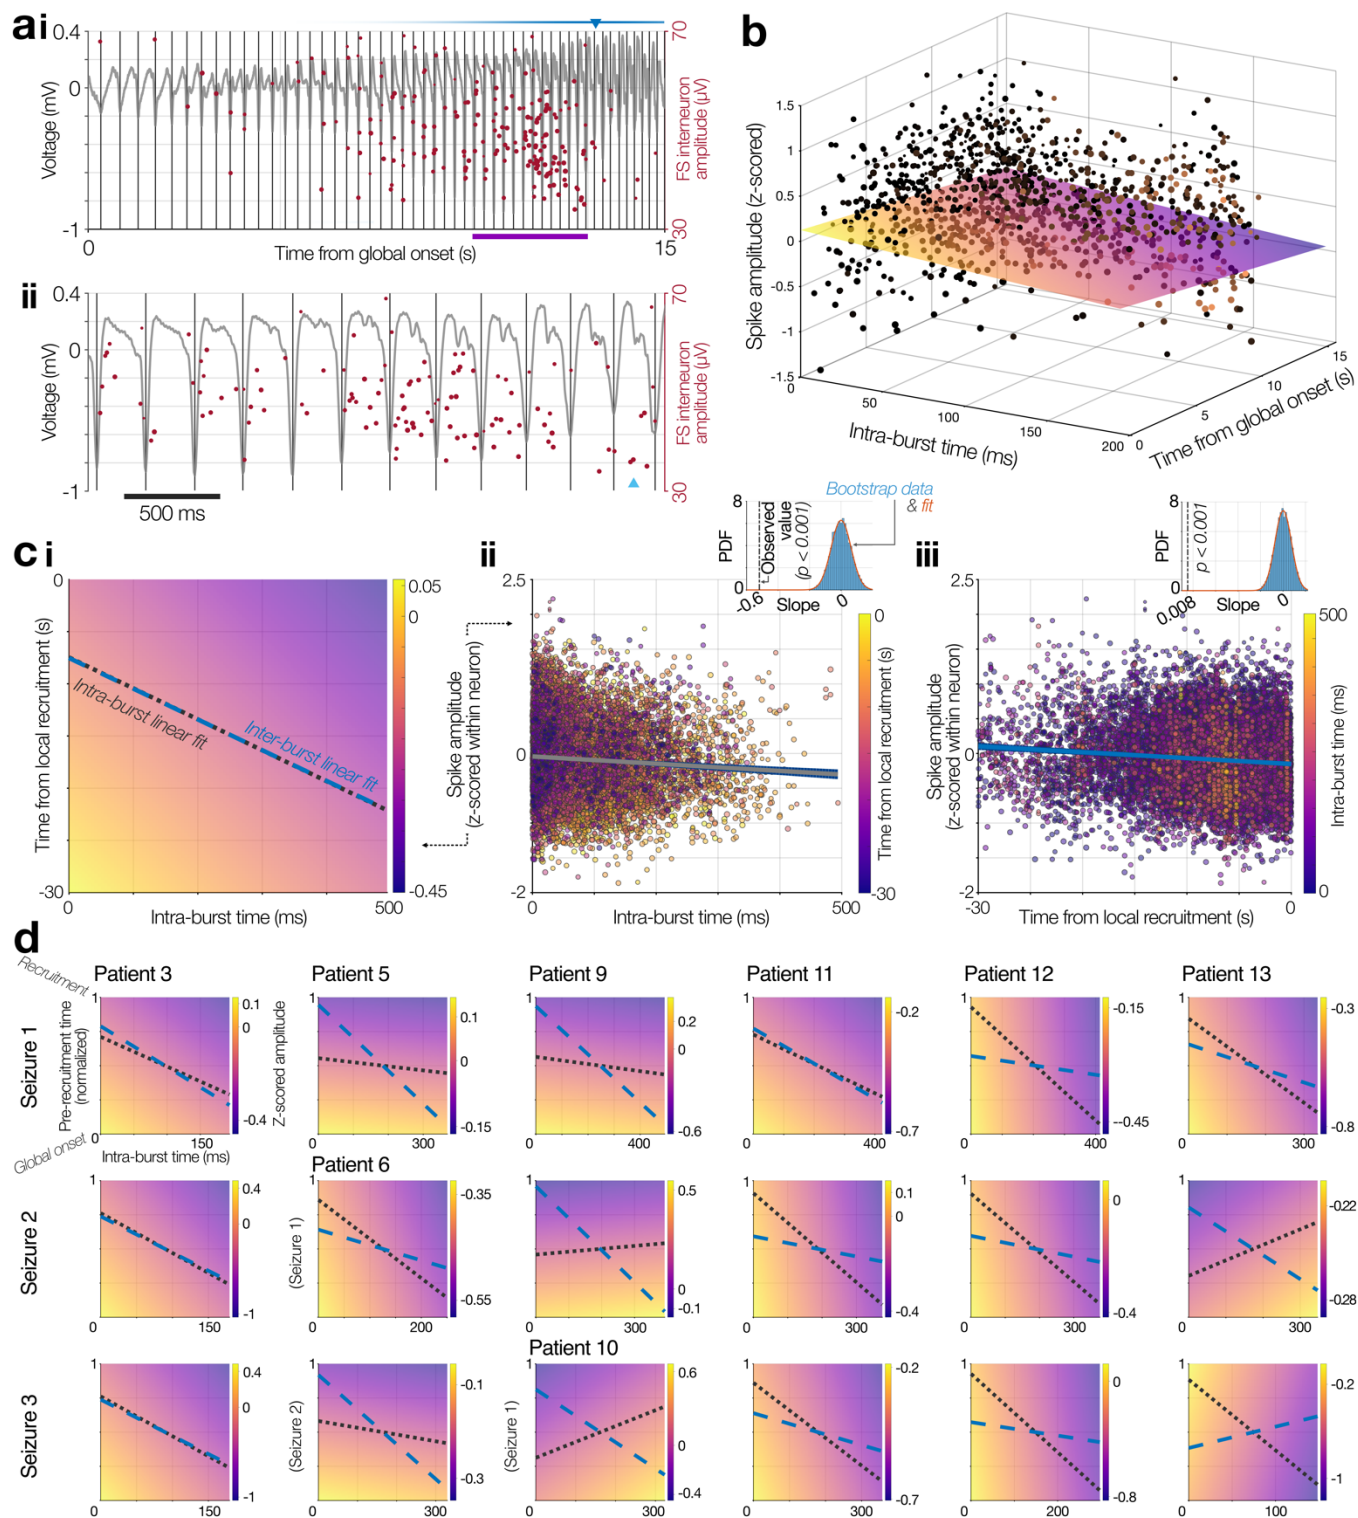

**Figure 6. Fast-spiking interneurons undergo repetitive, transient loss of amplitude across discharges.** (a)(i) Same seizure as Fig. 4a, showing an example FS interneuron's action potential amplitudes through time (red dots, each scaled by confidence of match to that neuron). Black lines show the trough of each ictal discharge in the mean LFP across the MEA (gray trace). Blue triangle: mean local recruitment at the MEA; blue bar: probability density function for the distribution of local recruitment times across the MEA. (ii) Enlargement of the epoch marked in purple in **i**. Cyan triangle: local recruitment at the shown FS interneuron's channel. (b) Action potential amplitudes from all FS interneurons from the same seizure in **a**, with action potentials from each discharge plotted on the x-axis (intra-burst time), aligned to when that discharge started with respect to global seizure onset (y-axis). Dot color represents the ordinal number for the action potential within its neuron during that discharge, and diameter shows confidence it arose from its assigned neuron. Colored plane shows a 2D linear regression fit to these spike amplitudes. (c) Equivalent linear regression fits for the full population of FS interneurons across all rhythmic onset seizures, showing the 2D plane, the intra-burst data, and the continuous data (**i-iii** respectively). Black dotted [cont'd overleaf]

284  
285  
286  
287  
288  
289  
290  
291  
292  
293  
294  
295

296 [cont'd from previous page] line and blue dashed line in *i* show the linear fits for intra- and inter-burst data respectively, on the  
297 same scale as the color bar. Insets in *ii* & *iii* show the observed coefficient versus bootstrap data from repeat runs while shuffling  
298 the temporal order of action potentials, revealing a significant reduction in amplitude both within discharge and through time. (*d*)  
299 2D linear regressions and accompanying slope fits as per *c i*, for each rhythmic onset seizure.

300 Inter-burst amplitudes also decreased prior to local ictal recruitment ( $-1.49 \times 10^{-2} \pm 1.79 \times 10^{-2}$  SD  $s^{-1}$ ),  
301 with 17 of 18 seizures (94.4%) showing progressive pre-recruitment reductions in average FS interneuron  
302 amplitudes (Fig. 6d). Across the whole population, these inter-burst amplitude trajectories were a larger  
303 loss of amplitude than expected by chance, again comparing to a bootstrapped null distribution from  
304 shuffled spike orders, repeated 10,000 times ( $P = 4.44 \times 10^{-31}$ ). We therefore hypothesized that these  
305 repetitive amplitude alterations are indicative of repeating, short-duration depolarization-inactivated  
306 action potentials<sup>55,58,59</sup> due to the large excitatory barrage onto the PV<sup>+</sup> interneurons.

### 307 **Out-of-phase firing and transient depolarization block of fast-spiking interneurons is** 308 **inherent to a Hodgkin-Huxley model**

309 The observed intra- and inter-burst amplitude trajectories in the FS population are in keeping with the  
310 hypothesis of repeated, brief depolarization blocks that eventually overwhelm their inhibitory restraint  
311 allowing the seizure to propagate into the local tissue. Given that patient recordings do not allow for  
312 experimental probing of the cause of these observed neuronal behaviors, we instead developed a  
313 computational model reproducing the effect, to test the hypothesis that the observed out-of-phase firing  
314 is an inherent result of the cell-type specific size and dynamics when excitatory input increases across  
315 the population.

316 Using a 10-neuron cortical model characterized by Hodgkin-Huxley type dynamics<sup>58</sup>, comprised of 20%  
317 inhibitory and 80% excitatory cells with cell-type specific activity profiles<sup>60</sup> (Fig. 7a, b; see Methods), we  
318 were able to reproduce markedly similar firing patterns to the observed human data when injected with  
319 an ictal rhythmic input (Fig. 7c–f; c.f. Fig. 4). At seizure onset, the inhibitory and excitatory cells burst  
320 synchronously in-phase (Fig. 7e), followed by a phase delay in inhibitory bursting activity, ultimately  
321 leading to out-of-phase inhibitory bursting (Fig. 7f). Afterwards, the excitatory population begins to enter  
322 tonic firing, echoing observations in human recordings (Supplementary Fig. 1). Intracellularly, we see that  
323 the inhibitory population is characterized by decreasing spike amplitudes within bursts (Fig. 7e), followed  
324 by decreasing spike amplitudes overall (Fig. 7f). This phenomenon is associated with reduced synaptic  
325 transmission<sup>37</sup>, and is indicative of the inhibitory population transiently entering and exiting neuronal  
326 saturation, leading to the phase shift and eventual out-of-phase bursting activity captured extracellularly  
327 and in the net firing rate through time (Fig. 7d).

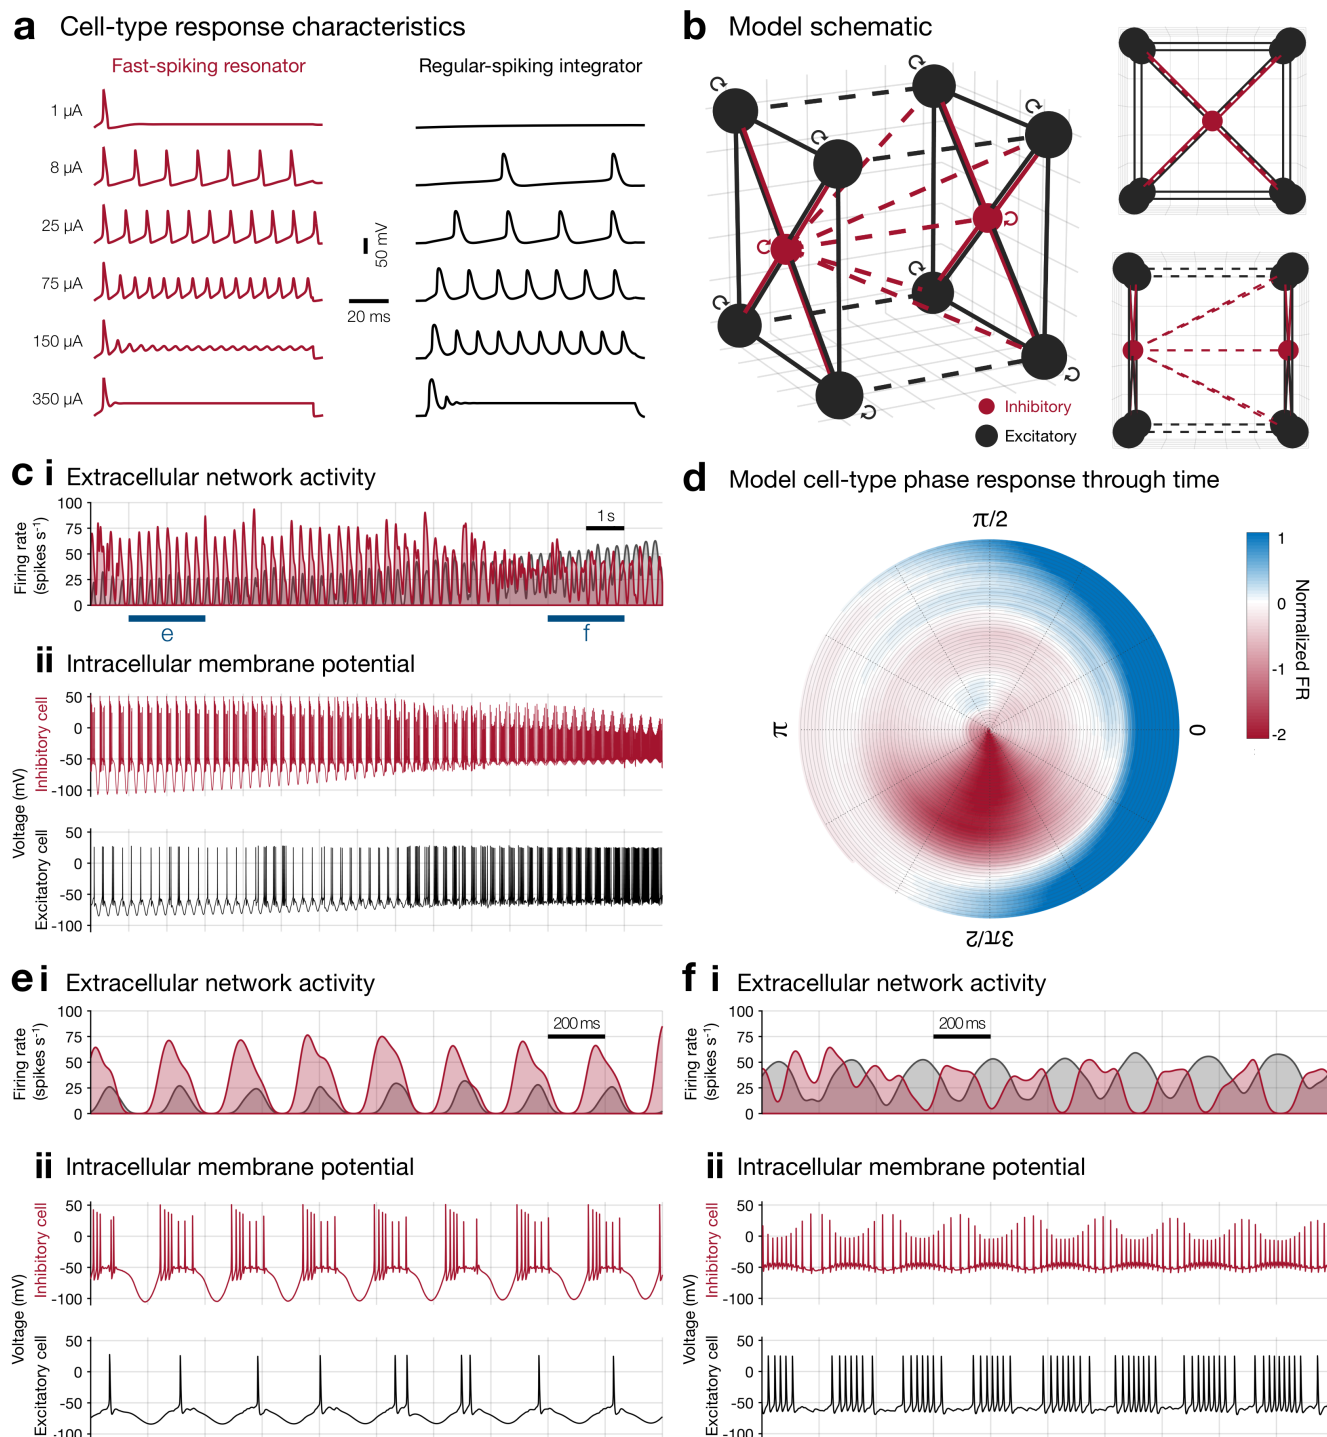

328

329

330

331

332

333

334

335

336

337

338

339

340

341

342

**Figure 7. A Hodgkin-Huxley model of the ictal pre-recruitment period corroborates clinical patterns.** (a) Cell type response characteristics for fast-spiking resonator type neurons (inhibitory; red) and regular-spiking integrator type neurons (excitatory; black). Fast-spiking resonator type neurons will saturate prior to regular-spiking integrator type neurons at lower input currents. (b) Model schematic of the 10-neuron model, with excitatory and inhibitory cells in a 4:1 ratio, including front and side view. (c) The extracellular network activity of the model corroborates the extracellular network activity of the patient data. At seizure onset, the inhibitory and excitatory populations burst in-phase. As the seizure progresses towards ictal recruitment, the inhibitory population begins to burst out-of-phase. This can be attributed to neuronal saturation of the inhibitory population, which can be observed by the decreasing spike amplitudes within bursts and overall in the intracellular membrane potential. (d) Cell-type specific firing phase/time plots as per Fig. 4c for the extracellularly detected spikes in the model. The instantaneous angle of the sine wave in the injected current provided the phase values since the local field potential is not calculated in the Hodgkin-Huxley model. (e & f) Magnifications for the marked epochs in (d), revealing the early in-phase activity of the inhibitory cells and later apparent out-of-phase activity respectively. Note the temporary intracellular loss of amplitude within discharges in the inhibitory cell in (e), and the further loss of amplitude resulting in loss of tracking in the extracellular data, including a lack of complete recovery between bursts as the modeled ictal wavefront approaches in (f).

343 These results offer a mechanistic basis to explain qualitatively the transition of inhibitory firing from in-  
 344 out-of-phase. In order, therefore, to make a quantitative comparison between the model and patient data,  
 345 triple correlation—a method that fully characterizes spatiotemporal network activity<sup>61</sup>—was computed on  
 346 the population spike data from the model and from a representative seizure (Patient 3, seizure 1; see  
 347 Methods). Relative contributions of motif-classes quantitatively describe network activity at any given  
 348 moment, and the prevalence of each motif-class through time was similar to the observed patient data  
 349 (Fig. 8a;  $0.0028 \leq p \leq 0.03$ , Benjamini-Hochberg-corrected).

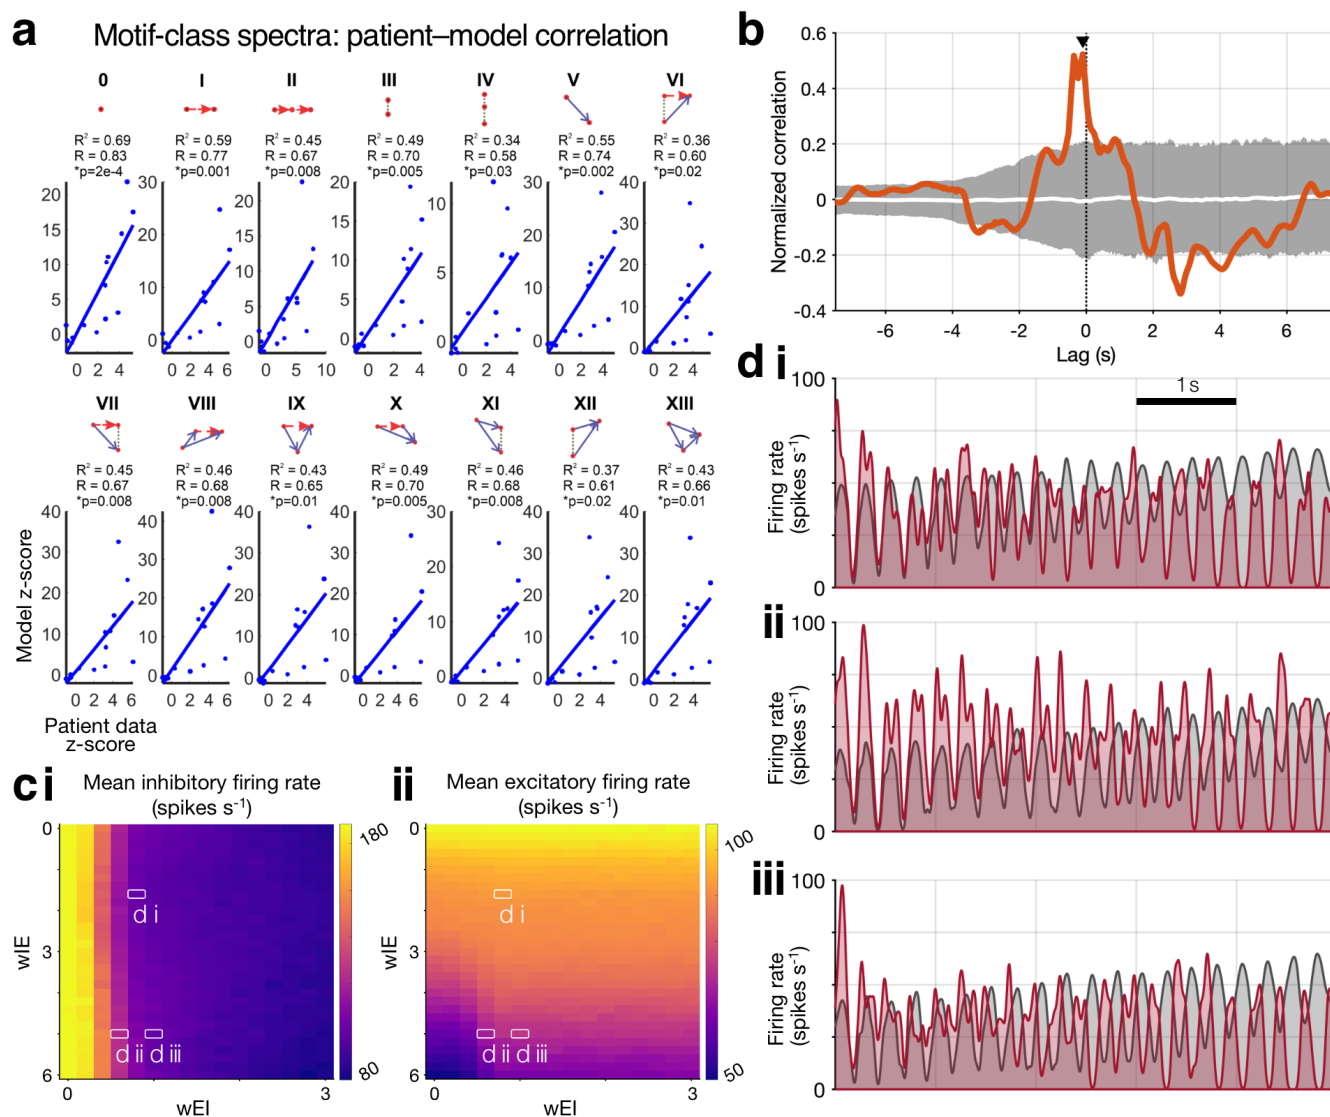

350

351 **Figure 8. Quantitative network comparison and model parameter exploration.** (a) The model output and observed patient  
 352 data were significantly similar across all 14 motif-classes. One-second epochs were normalized to the values in each motif-class  
 353 during the first 6 seconds—when both cell-types were unilaterally in-phase—and z-scores relative to this early epoch  
 354 were compared across the patient data and model for each motif-class and epoch. In each, the patient data and model were  
 355 significantly correlated ( $R$ ,  $R^2$  and raw  $P$ -values inset; maximal  $P$  after Benjamini-Hochberg-correction = 0.03). (b) The circular  
 356 phase distances between the excitatory and inhibitory populations firing rates through time show a significant correlation between  
 357 the model and the patient recording ( $r = 0.52$ ;  $P < 0.001$ ). (c) The mean firing rates for (i) the inhibitory and (ii) the excitatory  
 358 populations, in response to adjusting the cross-synaptic weights. The inhibitory population firing rate is strongly affected by  
 359 the strength of  $w_{EI}$ , rapidly decreasing as the excitatory weighting increases. The excitatory population firing rate is mainly  
 360 dependent on the strength of  $w_{IE}$ . (d) Representative snapshots of various combinations of synaptic weights as labeled in **c**. Panel **d iii** is  
 361 the combination of synaptic weights used in Fig. 7.

362 Cross correlation of the cell-type specific firing phases (i.e., the circular distance between excitatory and  
363 inhibitory phase angles through time, see Methods) showed significant similarity in the temporal evolution  
364 of excitatory and inhibitory firing patterns between the model and observed patient data (Fig. 8b;  $r = 0.52$ ,  
365  $P < 0.001$ ), albeit with a small temporal shift of 0.11 s. In combination these show quantitative agreement  
366 between the model and patient data within individual motif-classes, across the full network, and with cell-  
367 type specific firing patterns.

368 We then sought to measure the inhibitory and excitatory network activities in response to adjusting the  
369 strength of the synaptic connections between these two networks (Fig. 8c, d). Four synaptic connection  
370 types exist in the model, excitatory onto excitatory and inhibitory cells ( $w_{EE}$  and  $w_{EI}$  respectively), and  
371 inhibitory onto excitatory and inhibitory cells ( $w_{IE}$  and  $w_{II}$  respectively). Evaluating the mean firing rate in  
372 response to changes in the cross-synaptic weights revealed that strengthening  $w_{EI}$  results in a sharp  
373 decrease in inhibitory population firing rate in the 5 seconds preceding recruitment (Fig. 8ci). As expected,  
374 an increase in  $w_{IE}$  resulted in a reduction of excitatory activity (Fig. 8cii). Similar out-of-phase inhibitory  
375 firing in the pre-recruitment period could be elicited across a range of cross-synaptic weightings, with  
376 subtle alterations to the onset speed and magnitude of inhibitory collapse (Fig. 8d). This analysis  
377 suggests this mechanism of delayed interneuron burst firing may commonly contribute independently to  
378 the inhibitory failure that permits seizure propagation.

## 379 Discussion

380 Our findings highlight that spontaneous focal seizures in human neocortex show stereotyped inhibitory  
381 activity, with large increases in fast-spiking (FS) interneuronal firing early in the seizure. These increases,  
382 however, were delayed from the first ictal activity (“global” seizure onset), instead aligning to the moments  
383 immediately preceding the local tissue becoming “recruited” to the seizure-driving territory. This pre-  
384 recruitment activity involved a transition to tonic firing in the FS interneuron population, followed by a  
385 collapse in firing rate preceding the moment of maximal excitatory firing. Combining quantitative analysis  
386 of single neuronal firing patterns and computational modeling revealed repetitive, *transient* depolarization  
387 block as the likely culprit of this inhibitory firing reduction, and by extension, a likely mechanism of seizure  
388 propagation—especially into tissue that is not itself pathological.

389 This temporal relationship between cell-type specific firing and local recruitment becomes clearer when  
390 contextualized by the dual territory hypothesis of an ictal “core” of recruited tissue and a surrounding  
391 penumbra dominated by feedforward inhibition<sup>22,26,27,62</sup>. In this setting, ictal discharges emanate from a  
392 propagating wavefront through the cortex<sup>45</sup>, causing a band of increased inhibitory firing ahead of it,  
393 primarily (though not exclusively) via the fast-spiking, parvalbumin containing (PV+) interneurons<sup>25,35</sup>.  
394 This inhibitory firing must then collapse, as recently observed in an *in vivo* rodent model<sup>63</sup>, or become

395 incapable of controlling runaway excitatory firing prior to that region being successfully recruited into the  
396 core, seizure-driving territory.

397 We showed previously that upon recruitment to this ictal core territory, which occurs on a cell-by-cell  
398 basis<sup>28</sup> within cortical columns<sup>22</sup>, a neuron's action potentials undergo waveform alterations due to the  
399 paroxysmal depolarizing shift, and as a result, the ictal wavefront can be defined by the local population's  
400 action potential durations<sup>28,44</sup>. Analyzing the fast-spiking interneuronal firing rates as a function of this  
401 metric of local recruitment revealed that as the ictal wavefront approaches, the local inhibitory activity  
402 does indeed increase substantially, before subsiding (albeit still remaining above pre-ictal firing rates) as  
403 the tissue becomes recruited, in keeping with the prior temporal analyses (Fig. 3, Supplementary Movies  
404 1 & 2).

405 The observed increase in inhibitory firing—immediately preceding ictal invasion—could be viewed as  
406 evidence that this interneuronal activity is in some way causative of the seizure<sup>64</sup>, as has been suggested  
407 for low-voltage fast activity onset seizures in human mesial structures<sup>16</sup> and animal models<sup>15,29</sup>. The  
408 increases in this dataset of rhythmic onset neocortical seizures, however, appear instead to be  
409 attributable to the strong excitation derived from the nearby seizure<sup>50</sup>—the distribution of out-of-phase  
410 inhibitory firing across all 18 seizures from the 8 patients with rhythmic onset seizures makes it unlikely  
411 for the strong interneuron firing to be driving the seizure (Figs. 3 & 4). Moreover, both inhibitory and  
412 excitatory firing is at first heavily entrained to the rhythm after seizure onset, indicative that the shift to  
413 out-of-phase, followed by tonic firing, is driven from an unrecorded location elsewhere. These data are in  
414 keeping with recent *in vivo* work that suggested that, while depolarizing GABA may occur, it is rare outside  
415 of the experimental conditions used in *in vitro* work<sup>65</sup>.

416 Nevertheless, this does not exclude an interneuronal cause of any initial discharge that seeds the seizure  
417 itself, instead focusing on the method of ictal spread once the seizure is already underway (though the  
418 same mechanisms explored here would equally be viable to elucidate onset mechanisms, e.g. the “herald  
419 spike” at the start of low-voltage fast activity onset seizures eliciting a similar inhibitory response). The  
420 chloride-loading hypothesis, for example, is still feasible as a seizure initiation mechanism due to “static”  
421 chloride dysregulation in cells with decreased expression of the potassium-chloride co-transporter,  
422 KCC2<sup>2,7,10,66,67</sup>, even if it appears unlikely to be the primary cause of inhibitory failure as seizures spread  
423 through the neocortex, since this should result in peaks in excitatory firing concomitant with the inhibitory  
424 activity. Likewise, it is not improbable that once the seizure has spread to a region, i.e. after the reduction  
425 in inhibitory firing seen here, that chloride-loading in the pyramidal population occurs, further damaging  
426 the region's inhibitory control. Optogenetic stimulation of PV+ interneurons in an *in vivo* model confirmed  
427 the plausibility of this scenario, showing a shift from anti- to pro-epileptic effects once the seizure was  
428 already underway, which could be suppressed via over-expression of KCC2<sup>68</sup>.



429 This focus here on ictal *propagation* mechanisms, rather than *onset* causes, might therefore seem  
430 relatively narrow in scope. However, many potential mechanisms for seizure onset have been  
431 suggested<sup>12,69–71</sup> and it is likely that some, if not many, of these coexist. Acknowledging the constraints  
432 of seizure type and recording location, our data here suggest that propagation mechanisms, meanwhile,  
433 are likely more similar from patient to patient and seizure to seizure. Moreover, considering seizures have  
434 been hypothesized to originate from volumes smaller than 1 cubic mm<sup>69,72</sup>, it would appear doubtful that  
435 an electrode would often be sampling the true origin of the seizure, and so the majority of our mechanistic  
436 understanding *in vivo* is derived from propagated activity. Since the spread mechanism appears to be  
437 common across a variety of seizure onset patterns, targeting it in order to prevent the interneuronal out-  
438 of-phase firing and tonic transition may be broadly applicable.

439 During the propagation in these seizures, therefore, the question remains as to why the inhibition  
440 eventually gives way to allow the pathological activity to spread: what causes the firing rate reductions  
441 seen in the interneuronal population? One possibility is that these inhibitory cells are themselves being  
442 inhibited, for example by VIP+ cells<sup>73</sup>; a group that at present is not readily isolable from the population  
443 in extracellular recordings. Another plausible cause is a depletion of GABA vesicles in these highly active  
444 interneurons<sup>74</sup>.

445 An alternative explanation is that these interneurons are entering depolarization block, as has been  
446 suggested from *in vitro* models<sup>24,32</sup>, although studies have typically considered depolarization block as  
447 long-lasting (e.g. 5–40 seconds<sup>32</sup>), rather than repetitive, transient events, which would preclude their  
448 identification in these recordings since the cells overwhelmingly do not cease firing for prolonged  
449 durations. Continuously assessing action potential shapes, however, revealed amplitude fluctuations  
450 paired to the rhythmic, out-of-phase discharges in keeping with paroxysmal depolarizations followed by  
451 brief recovery (Fig. 6). Linear regression fits to these amplitudes through time, both within each burst and  
452 across consecutive bursts, revealed a stable decrease during the bursts at the population level, and in  
453 the majority of individual rhythmic onset seizures (15 out of 18; black dotted lines, Fig. 6c, d). Similarly,  
454 the inter-burst fits showed reductions in amplitude recovery between bursts at the population level, and  
455 in all but one rhythmic onset seizure (blue dashed lines, Fig. 6c, d), potentially indicating an increasing  
456 inability to recover between subsequent ictal discharges, leading to the eventual inhibitory failure and  
457 propagation of the seizure.

458 We hypothesized that this transient depolarization block was a result of the inhibitory interneurons'  
459 smaller cell bodies<sup>37</sup>, and that their firing out-of-phase to the dominant ictal rhythm was a result of these  
460 blocks and recovery periods. To examine this, we used an intentionally uncomplicated Hodgkin-Huxley  
461 model<sup>58</sup>, to assess whether the firing properties are intrinsic to the fundamental properties of the two cell  
462 types. A simple arrangement of “resonators” for inhibitory cells and “integrators” for excitatory cells—  
463 based on previously established parameter sets<sup>60</sup>—was readily able to produce the firing patterns seen

464 in the patient data, across a range of parameters (Figs. 7 & 8). Calculating the pseudo-extracellular trace  
465 for the modeled population by cell-type, and incorporating a threshold as used in spike sorting, revealed  
466 the transition to out-of-phase inhibitory activity was a result of saturation of the smaller cell-bodied  
467 interneurons. Without any intervention, this saturation was maximal during the peak of the dominant ictal  
468 rhythm, causing the action potentials to become subthreshold for “extracellular” detection, before  
469 recovering between bursts, but doing so less effectively as time progressed, mirroring accurately the  
470 human data observations (c.f. Fig. 6).

471 Taken together, these results suggest an intrinsic property of inhibitory interneurons gives rise to their  
472 eventual failure to restrain focal neocortical seizures. This mechanism does not require pathological  
473 connections between neurons, nor a weakening of their inhibitory efficacy downstream (though both may  
474 contribute also). Therefore, at its most basic level, neocortex is vulnerable to spreading, runaway  
475 excitation due to inhibitory interneurons’ predisposition to entering depolarization block transiently in the  
476 presence of repeated, intense excitation. As a result, therapies aimed—somewhat counterintuitively—at  
477 briefly hyperpolarizing interneurons, such as has recently been explored in an organotypic slice  
478 preparation<sup>75</sup>, could be a promising avenue for future interventions in neocortical focal epilepsy.

## 479 **Methods**

### 480 **Human microelectrode recordings**

481 Thirteen adult patients undergoing surgical evaluation for pharmaco-resistant focal epilepsy across three  
482 clinical centers were implanted with “Utah”-style micro-electrode arrays (MEAs; Blackrock Microsystems,  
483 Salt Lake City, UT) simultaneous to standard clinical electrocorticography (ECoG). Informed consent was  
484 given by all participants prior to surgery and all procedures were approved by the respective Institutional  
485 Review Boards of Columbia University Medical Center, University of Utah and Massachusetts General  
486 Hospital/Brigham & Women’s Hospital. Clinical determination of the seizure onset zone (SOZ) and  
487 regions of spread were made by the treating physicians. MEAs were implanted into neocortical gyri based  
488 on presurgical estimation of the ictogenic region and consisted of 96 electrodes arranged in a 10 x 10  
489 grid (with inactive corners) with an inter-electrode distance of 400  $\mu$ m. Electrode lengths were either 1.0  
490 mm (patients 1–10 & 13) or 1.5 mm (patients 11 & 12).

491 Neural data from the MEA were recorded at 30 kHz sample rate with a range of  $\pm$  8 mV with 16-bit  
492 precision, with a hardware filter between 0.3 Hz and 7.5 kHz. The reference was either subdural or  
493 epidural, chosen depending on recording quality. Simultaneous ECoG signals were recorded with sample  
494 rates of either 500 Hz or 2 kHz and a bandpass filter of 0.5 Hz to  $\frac{1}{4}$  the sampling rate.

## 495 **Single-unit isolation and tracking**

496 To account for waveshape alterations as a result of pathological activity and increases in background  
497 neural firing obscuring clusters, single-units were tracked through the seizure using convex hull-based  
498 template-matching, as previously described<sup>28</sup>.

499 Briefly, data from the peri-ictal period were bandpass filtered between 300 Hz and 5 kHz with a 1,024-  
500 order symmetric FIR filter to produce multi-unit activity (MUA) signals. The ictal period was blanked in  
501 order to perform initial spike sorting only on stable, baseline data,<sup>44</sup> then spikes were detected with a  
502 threshold of 4.5 times the standard deviation as estimated from the median absolute deviation<sup>76</sup>. Spikes  
503 were clustered on a channel-by-channel basis using a modified version of the “UltraMegaSort2000”  
504 MATLAB toolbox<sup>77-79</sup>. Clusters were deemed single units if they satisfied the following criteria: (a) clear  
505 separation from other clusters on Fisher’s linear discriminant in principal component space; (b) <1%  
506 spikes within the 2 ms absolute refractory period; (c) absence of outliers based on the expected  $\chi^2$   
507 distribution of Mahalanobis distances; and (d) <1% missing spikes below threshold for detection as  
508 estimated by a Gaussian distribution fit to spike voltages<sup>78</sup>.

509 Waveforms were then detected in the full peri-ictal period, including the seizure, in a similar manner  
510 though without clustering. Principal component scores were calculated for these spikes based on the  
511 principal component space defined during the original spike sorting. Waveforms that fell within the convex  
512 hull of a previously defined single unit were selected as putative action potentials from the same neuron.  
513 The confidence that each spike arose from its assigned neuron was then calculated based on Gaussian  
514 fits for the voltage at each data point in the original single-unit. This method allows for more accurate  
515 tracking of neuronal firing despite action potential waveform alterations as a result of ion concentration  
516 changes or paroxysmal depolarization shifts, or due to an increase in “noise” levels obscuring previously  
517 isolated clusters<sup>28</sup>.

## 518 **Cell-type subclassification**

519 The original single-units—prior to template matching for tracking through the seizure—were subclassified  
520 into putative cell-types based on mean extracellular waveforms and cell-intrinsic firing pattern  
521 autocorrelation as previously described<sup>42</sup>. Mean waveforms were calculated as the action potential-  
522 triggered average from the original, unfiltered signal and then z-scored. The unit’s firing rate  
523 autocorrelation over  $\pm 50$  ms was calculated in 0.5 ms bins.

524 Putative fast-spiking (FS) interneurons were isolated probabilistically from the regular-spiking population  
525 using a 2-component Gaussian mixture model on each unit’s mean waveforms in principal component  
526 space (Fig. 1a), a method which has been shown to separate inhibitory FS cells from the regular spiking  
527 population<sup>80</sup>.

528 To isolate putative inhibitory interneurons from the remaining non-FS population, a set of exponential  
529 equations was fitted to the autocorrelation for each unit not already classified as an FS interneuron, using  
530 the “fit\_ACG” function from the “CellExplorer” MATLAB toolbox<sup>81</sup>. To calculate the probability of a unit  
531 being inhibitory or excitatory we fitted a 2-component Gaussian mixture model to the  $\tau_{rise}$  exponential,  
532 which captures the cell-intrinsic propensity to fire bursts of action potentials—a feature that has been  
533 shown to separate putative excitatory and inhibitory cells<sup>81–83</sup> (Fig. 1b).

### 534 **Ictal recruitment and probabilistic firing rates**

535 A region defined by intense synaptic activity—due to the strong excitatory drive from the seizure—but  
536 without entrained, aberrant neuronal firing due to feedforward inhibition exists within tissue prior to its  
537 involvement in driving a seizure<sup>22,23,26,62</sup>. The moment of this transition (“ictal recruitment”) was defined at  
538 each microelectrode as previously described<sup>28,45</sup>. Briefly, the hallmark of ictal recruitment is transient,  
539 tonic neuronal firing, which subsequently transitions to “burst” firing as the wavefront of recruitment  
540 propagates away from the region, seeding rhythmic discharges back into the area<sup>45,56</sup>. To quantitatively  
541 define this moment of recruitment, a Gaussian kernel with 200 ms SD was convolved with the spike times  
542 detected in the MUA. A sustained, significant increase in this signal followed by a transition to burst firing  
543 was determined as the moment of local recruitment<sup>45</sup>. Ictal recordings without this signature activity were  
544 classified as unrecruited. Analyses of the “pre-recruitment” period for the whole MEA were calculated on  
545 an epoch between “global” seizure onset and the mean + SD of the wavefront time calculated across all  
546 channels on the MEA. Note that “pre-recruitment” refers to the time prior to local recruitment but after  
547 global seizure onset, rather than to a specific state of being “pre-recruited”.

548 Template-matching with convex hulls is intentionally permissive, to avoid undercounting activity from  
549 neurons whose action potential shapes have been altered or dropped below the noise threshold<sup>28</sup>. To  
550 account for this, instantaneous firing rates were calculated by convolving each unit’s spike times with a  
551 Gaussian kernel that was scaled to the confidence that that spike had arisen from its assigned unit, as  
552 described above and in more detail previously<sup>28</sup>. All subsequent analyses of firing times and patterns  
553 were weighted by the confidence for each action potential of interest. Z-scored firing rate changes within  
554 neurons (Fig. 3b) were calculated via the standard deviation of a Poisson distribution with the observed  
555 firing rates<sup>42,84</sup>.

### 556 **Phase analyses in rhythmic onset seizures**

557 Further analysis was performed on seizures with rhythmic onsets: to account for fluctuations in discharge  
558 timings, analyses of firing patterns were performed with respect to the instantaneous phase of the  
559 dominant ictal rhythm. Entrainment was calculated using the Rayleigh z-test, and unless specified  
560 otherwise, statistical differences in phase angles were calculated with the circular Kuiper test<sup>85</sup>.

561 Spiral time-phase plots were calculated by organizing the firing times of every neuron by their phase  
562 angle with respect to the dominant ictal rhythm through time, starting with global seizure onset at the  
563 center, and ending with local recruitment at the outer edge of the spiral (Fig. 4*ci*). As a result, ictal time—  
564 with respect to the instantaneous phase angle of the dominant ictal rhythm—is shown progressively  
565 expanding counter-clockwise from the center of the spiral until ictal recruitment at the outer edge. The  
566 gaussian-convolved (SD = 20 ms) firing rates could then be calculated as described above for each cell-  
567 type population, and smoothed on the resultant spiral (angular smoothing of 30°, radial smoothing of 0.1)  
568 to give an instantaneous estimate of phase-specific excitatory versus inhibitory firing evolving through  
569 time (Fig. 4*cii*, Fig. 5*c*).

570 Spike amplitude trajectories through time (Fig. 6) were calculated as linear regressions both within each  
571 burst, and as an overall fit through the pre-recruitment epoch, thus resulting in a two-dimensional plane  
572 for each seizure. Fits during the intra-burst time was limited to the lesser of 500 ms or  $\frac{3}{4}$  of the duration  
573 until the next discharge's peak, to avoid capturing the onset of the following discharge or analyzing firing  
574 unrelated to the current discharge.

## 575 **Hodgkin–Huxley model**

576 We simulated network activity of cell-type interactions during the transition from seizure onset to  
577 recruitment via a 10-neuron cortical model characterized by Hodgkin-Huxley type dynamics, in which the  
578 membrane potential,  $V$ , is governed by the following equation<sup>58</sup>:

$$579 \quad C \frac{dV}{dt} = I_{inject} - \bar{g}_{Leak}(V - E_{Leak}) - \bar{g}_{Na}m^3h(V - E_{Na}) - \bar{g}_Kn^4(V - E_K) - g_{syn}(V - E_{syn})$$

580 where  $I$  is current,  $C$  is the membrane capacitance,  $\bar{g}$  is the maximal conductance, and  $m$ ,  $n$ , and  $h$  are  
581 dimensionless variables associated with activation for sodium and potassium channels and inactivation  
582 for sodium channels respectively. Synaptic conductance,  $g_{syn}$ , is modeled by the alpha function:  
583  $\alpha \beta t e^{-\alpha \beta t}$  for  $t \geq 0$ , where  $\alpha$  and  $\beta$  are constants specific to cell-type synapses<sup>37,86,87</sup>. As per Tryba et  
584 al.<sup>37</sup>, for an excitatory synapse,  $\alpha = 25$  and  $\beta = 0.3 \text{ ms}^{-1}$ ; for an inhibitory synapse,  $\alpha = 3$  and  $\beta = 0.1 \text{ ms}^{-1}$ .  
585

586 Using previously established parameter sets<sup>60</sup>, we implemented fast-spiking/resonator (“Type II”<sup>88,89</sup>)  
587 behavior for the inhibitory cell type and regular-spiking/integrator (“Type I”<sup>88,89</sup>) activity for the excitatory  
588 cell type (Fig. 7*a*, Tables S2 & S3). These cell-types were configured in a network with 4:1 ratio for  
589 excitatory and inhibitory neurons respectively (Fig. 7*b*). The cortical model was placed in a passing ictal  
590 wave and rhythm ( $I_{inject}$ ), modeled as an exponential growth function and sinusoidal waveform  
591 respectively, and the resulting activity was determined (Fig. 7*c*). Assuming an extracellular electrode  
592 equidistant from the model neurons, its signal was determined as the signal proportional to the sum of  
593 the second derivatives of all membrane potentials, representing the transmembrane currents<sup>90</sup>.

594 To quantify similarities between the model outputs and the observed patient data, we computed triple  
595 correlation<sup>61</sup> for the resultant spike raster both for the model and for a representative patient recording  
596 (Patient 3, seizure 1; Fig. 4a; each sampled at 500 Hz). Triple correlation is a method that relates three  
597 nodes: one reference node and up to two other nodes separated by up to two lags in both space ( $n_1$  &  
598  $n_2$ ) and time ( $t_1$  &  $t_2$ )<sup>61</sup>. These three-node configurations can be collapsed into fourteen qualitatively  
599 distinct motif classes. Furthermore, these third-order motif configurations are sufficient for a complete  
600 and unique characterization of the network activity<sup>61</sup>. Triple correlation was calculated in 1 second bins,  
601 with a spatial window that covered the entirety of the dataset and a temporal window of  $\pm 50$  ms. To  
602 compare firing phases between the model and patient data, cell-type specific population Gaussian-  
603 convolved instantaneous firing rates (see above) in each were de-meant and narrow-band filtered (3–  
604 5.5 Hz; 500<sup>th</sup> order symmetric FIR), and their instantaneous phase angles calculated using the Hilbert  
605 transform. Cross correlation was then calculated on the circular distance between the two cell-types'  
606 phase angles was then calculated through time both for the model and the patient data.

### 607 **Data availability**

608 The raw data that support the findings of this study are available upon reasonable request from the  
609 corresponding author. To protect the privacy of research participants, they are not publicly accessible.

### 610 **Code availability**

611 Accompanying code is available at <https://github.com/edmerix/>

### 612 **Author contributions**

613 E.M.M., E.H.S., E.D.S., G.M.M., R.R.G., S.A.S., B.G., P.A.H., E.N.E., J.R.M., S.S.C. and C.A.S. were  
614 involved in collecting the data. E.M.M., S.S.D., E.H.S., A.J.T., W.v.D and C.A.S. conceived the study.  
615 E.M.M., A.H.A-M. and E.H.S. analyzed the data. S.S.D. and W.v.D. created the computational model.  
616 E.M.M., S.S.D., B.G., A.J.T., W.v.D. and C.A.S. drafted and edited the manuscript. All authors approved  
617 the final version.

### 618 **Funding**

619 R01 NS084142 and R01 NS110669 (C.A.S.), University of Chicago MSTP Training Grant T32GM007281  
620 and F31NS127493 (S.S.D.).

### 621 **Competing interests**

622 S.A.S. is a consultant for Boston Scientific, Zimmer Biomet, Neuropace, Koh Young, Sensoria  
623 Therapeutics and Varian Medical, and is co-founder of Motif Neurotech. The other authors report no  
624 competing interests.

## 625 Correspondence

626 Correspondence and requests for materials should be addressed to E.M.M. or C.A.S.

## 627 References

- 628 1. Moshé, S. L., Perucca, E., Ryvlin, P. & Tomson, T. Epilepsy: new advances. *Lancet Lond. Engl.* **385**,  
629 884–898 (2015).
- 630 2. Weiss, S. A. Chloride ion dysregulation in epileptogenic neuronal networks. *Neurobiol. Dis.* **177**,  
631 106000 (2023).
- 632 3. Wenzel, M., Huberfeld, G., Grayden, D. B., de Curtis, M. & Trevelyan, A. J. A debate on the neuronal  
633 origin of focal seizures. *Epilepsia* (2023) doi:10.1111/epi.17650.
- 634 4. Graham, R. T. *et al.* Optogenetic stimulation reveals a latent tipping point in cortical networks during  
635 ictogenesis. *Brain J. Neurol.* **146**, 2814–2827 (2023).
- 636 5. Trevelyan, A. J., Graham, R. T., Parrish, R. R. & Codadu, N. K. Synergistic Positive Feedback  
637 Mechanisms Underlying Seizure Initiation. *Epilepsy Curr.* **23**, 38–43 (2023).
- 638 6. Dzhalala, V. I. *et al.* Progressive NKCC1-dependent neuronal chloride accumulation during neonatal  
639 seizures. *J. Neurosci.* **30**, 11745–11761 (2010).
- 640 7. Huberfeld, G. *et al.* Perturbed chloride homeostasis and GABAergic signaling in human temporal lobe  
641 epilepsy. *J. Neurosci.* **27**, 9866–9873 (2007).
- 642 8. Lillis, K. P., Kramer, M. A., Mertz, J., Staley, K. J. & White, J. A. Pyramidal cells accumulate chloride  
643 at seizure onset. *Neurobiol. Dis.* **47**, 358–366 (2012).
- 644 9. Alfonsa, H. *et al.* The Contribution of Raised Intraneuronal Chloride to Epileptic Network Activity. *J.*  
645 *Neurosci.* **35**, 7715–7726 (2015).
- 646 10. Pallud, J. *et al.* Cortical GABAergic excitation contributes to epileptic activities around human glioma.  
647 *Sci. Transl. Med.* **6**, 244ra89 (2014).
- 648 11. Ellender, T. J., Raimondo, J. V., Irkle, A., Lamsa, K. P. & Akerman, C. J. Excitatory Effects of  
649 Parvalbumin-Expressing Interneurons Maintain Hippocampal Epileptiform Activity via Synchronous  
650 Afterdischarges. *J. Neurosci.* **34**, 15208–15222 (2014).
- 651 12. Bragin, A., Wilson, C. L. & Engel, J. Chronic Epileptogenesis Requires Development of a Network of  
652 Pathologically Interconnected Neuron Clusters: A Hypothesis. *Epilepsia* **41**, S144–S152 (2000).
- 653 13. Yang, J. C. *et al.* Microscale dynamics of electrophysiological markers of epilepsy. *Clin. Neurophysiol.*  
654 S1388245721006702 (2021) doi:10.1016/j.clinph.2021.06.024.
- 655 14. Chang, M. *et al.* Brief activation of GABAergic interneurons initiates the transition to ictal events  
656 through post-inhibitory rebound excitation. *Neurobiol. Dis.* **109**, 102–116 (2018).
- 657 15. de Curtis, M. & Avoli, M. GABAergic networks jump-start focal seizures. *Epilepsia* **57**, 679–687  
658 (2016).
- 659 16. Elahian, B. *et al.* Low-voltage fast seizures in humans begin with increased interneuron firing. *Ann.*  
660 *Neurol.* **84**, 588–600 (2018).
- 661 17. Prince, D. A. & Wilder, B. J. Control mechanisms in cortical epileptogenic foci. ‘Surround’ inhibition.  
662 *Arch Neurol* **16**, 194–202 (1967).
- 663 18. Dichter, M. & Spencer, W. A. Penicillin-induced interictal discharges from the cat hippocampus. II.  
664 Mechanisms underlying origin and restriction. *J Neurophysiol* **32**, 663–687 (1969).

- 665 19. Wong, B. Y. & Prince, D. A. The lateral spread of ictal discharges in neocortical brain slices. *Epilepsy*  
666 *Res* **7**, 29–39 (1990).
- 667 20. Schwartz, T. H. & Bonhoeffer, T. In vivo optical mapping of epileptic foci and surround inhibition in  
668 ferret cerebral cortex. *Nat Med* **7**, 1063–1067 (2001).
- 669 21. Timofeev, I., Grenier, F. & Steriade, M. The role of chloride-dependent inhibition and the activity of  
670 fast-spiking neurons during cortical spike-wave electrographic seizures. *Neuroscience* **114**, 1115–  
671 1132 (2002).
- 672 22. Trevelyan, A. J., Sussillo, D., Watson, B. O. & Yuste, R. Modular propagation of epileptiform activity:  
673 evidence for an inhibitory veto in neocortex. *J. Neurosci.* **26**, 12447–12455 (2006).
- 674 23. Trevelyan, A. J., Sussillo, D. & Yuste, R. Feedforward inhibition contributes to the control of  
675 epileptiform propagation speed. *J. Neurosci.* **27**, 3383–3387 (2007).
- 676 24. Cammarota, M., Losi, G., Chiavegato, A., Zonta, M. & Carmignoto, G. Fast spiking interneuron control  
677 of seizure propagation in a cortical slice model of focal epilepsy. *J. Physiol.* **591**, 807–822 (2013).
- 678 25. Parrish, R. R., Codadu, N. K., Mackenzie Gray Scott, C. & Trevelyan, A. J. Feedforward inhibition  
679 ahead of ictal wavefronts is provided by both parvalbumin- and somatostatin-expressing  
680 interneurons. *J. Physiol.* **597**, 2297–2314 (2019).
- 681 26. Schevon, C. A. *et al.* Evidence of an inhibitory restraint of seizure activity in humans. *Nat. Commun.*  
682 **3**, 1060–11 (2012).
- 683 27. Weiss, S. A. *et al.* Ictal high frequency oscillations distinguish two types of seizure territories in  
684 humans. *Brain* **136**, 3796–3808 (2013).
- 685 28. Merricks, E. M. *et al.* Neuronal Firing and Waveform Alterations through Ictal Recruitment in Humans.  
686 *J. Neurosci.* **41**, 766–779 (2021).
- 687 29. Gnatkovsky, V., Librizzi, L., Trombin, F. & de Curtis, M. Fast activity at seizure onset is mediated by  
688 inhibitory circuits in the entorhinal cortex in vitro. *Ann. Neurol.* **64**, 674–686 (2008).
- 689 30. Shiri, Z., Manseau, F., Lévesque, M., Williams, S. & Avoli, M. Interneuron activity leads to initiation  
690 of low-voltage fast-onset seizures: Epileptiform Synchronization. *Ann. Neurol.* **77**, 541–546 (2015).
- 691 31. Lévesque, M., Herrington, R., Hamidi, S. & Avoli, M. Interneurons spark seizure-like activity in the  
692 entorhinal cortex. *Neurobiol. Dis.* **87**, 91–101 (2016).
- 693 32. Ziburkus, J., Cressman, J. R., Barreto, E. & Schiff, S. J. Interneuron and pyramidal cell interplay  
694 during in vitro seizure-like events. *J. Neurophysiol.* **95**, 3948–3954 (2006).
- 695 33. Misra, A., Long, X., Sperling, M. R., Sharan, A. D. & Moxon, K. A. Increased neuronal synchrony  
696 prepares mesial temporal networks for seizures of neocortical origin. *Epilepsia* **3**, 219–14 (2018).
- 697 34. Trevelyan, A. J. & Schevon, C. A. How inhibition influences seizure propagation. *Neuropharmacology*  
698 **69**, 45–54 (2013).
- 699 35. Sessolo, M. *et al.* Parvalbumin-Positive Inhibitory Interneurons Oppose Propagation But Favor  
700 Generation of Focal Epileptiform Activity. *J. Neurosci.* **35**, 9544–9557 (2015).
- 701 36. Bikson, M., Hahn, P. J., Fox, J. E. & Jefferys, J. G. R. Depolarization block of neurons during  
702 maintenance of electrographic seizures. *J. Neurophysiol.* **90**, 2402–2408 (2003).
- 703 37. Tryba, A. K. *et al.* Role of paroxysmal depolarization in focal seizure activity. *J. Neurophysiol.* **122**,  
704 1861–1873 (2019).
- 705 38. Huberfeld, G. *et al.* Glutamatergic pre-ictal discharges emerge at the transition to seizure in human  
706 epilepsy. *Nat. Neurosci.* **14**, 627–634 (2011).
- 707 39. Viitanen, T., Ruusuvuori, E., Kaila, K. & Voipio, J. The K<sup>+</sup>-Cl<sup>-</sup> cotransporter KCC2 promotes  
708 GABAergic excitation in the mature rat hippocampus: GABA excitation and KCC2. *J. Physiol.* **588**,  
709 1527–1540 (2010).



- 710 40. Köhling, R., D'Antuono, M., Benini, R., de Guzman, P. & Avoli, M. Hypersynchronous ictal onset in  
711 the perirhinal cortex results from dynamic weakening in inhibition. *Neurobiol. Dis.* **87**, 1–10 (2016).
- 712 41. Miri, M. L., Vinck, M., Pant, R. & Cardin, J. A. Altered hippocampal interneuron activity precedes ictal  
713 onset. *eLife* **7**, 1277 (2018).
- 714 42. Agopyan-Miu, A. H. *et al.* Cell-type specific and multiscale dynamics of human focal seizures in limbic  
715 structures. *Brain* **146**, 5209–5223 (2023).
- 716 43. Buzsàki, G., Anastassiou, C. A. & Koch, C. The origin of extracellular fields and currents — EEG,  
717 ECoG, LFP and spikes. *Nat. Rev. Neurosci.* **13**, 407–420 (2012).
- 718 44. Merricks, E. M. *et al.* Single unit action potentials in humans and the effect of seizure activity. *Brain*  
719 *J. Neurol.* **138**, 2891–2906 (2015).
- 720 45. Smith, E. H. *et al.* The ictal wavefront is the spatiotemporal source of discharges during spontaneous  
721 human seizures. *Nat Commun* **7**, 11098 (2016).
- 722 46. Diamond, J. M. *et al.* Travelling waves reveal a dynamic seizure source in human focal epilepsy.  
723 *Brain* **144**, 1751–1763 (2021).
- 724 47. Schlafly, E. D. *et al.* Multiple Sources of Fast Traveling Waves during Human Seizures: Resolving a  
725 Controversy. *J. Neurosci.* **42**, 6966–6982 (2022).
- 726 48. McCormick, D. A., Connors, B. W., Lighthall, J. W. & Prince, D. A. Comparative electrophysiology of  
727 pyramidal and sparsely spiny stellate neurons of the neocortex. *J. Neurophysiol.* **54**, 782–806 (1985).
- 728 49. Barthó, P. *et al.* Characterization of neocortical principal cells and interneurons by network  
729 interactions and extracellular features. *J. Neurophysiol.* **92**, 600–608 (2004).
- 730 50. Smith, E. H. *et al.* Dual mechanisms of ictal high frequency oscillations in human rhythmic onset  
731 seizures. *Sci. Rep.* **10**, 19166 (2020).
- 732 51. Liou, J. *et al.* Role of inhibitory control in modulating focal seizure spread. *Brain J. Neurol.* **141**, 2083–  
733 2097 (2018).
- 734 52. Liou, J. *et al.* A model for focal seizure onset, propagation, evolution, and progression. *eLife* **9**,  
735 e50927 (2020).
- 736 53. Tremblay, R., Lee, S. & Rudy, B. GABAergic Interneurons in the Neocortex: From Cellular Properties  
737 to Circuits. *Neuron* **91**, 260–292 (2016).
- 738 54. Kandel, E. R. & Spencer, W. A. The pyramidal cell during hippocampal seizure. *Epilepsia* **2**, 63–69  
739 (1961).
- 740 55. Kandel, E. R. & Spencer, W. A. Electrophysiology of hippocampal neurons. II. After-potentials and  
741 repetitive firing. *J Neurophysiol* **24**, 243–259 (1961).
- 742 56. Matsumoto, H. & Ajmone Marsan, C. Cortical cellular phenomena in experimental epilepsy: Ictal  
743 manifestations. *Exp Neurol* **9**, 305–326 (1964).
- 744 57. Traub, R. D. & Wong, R. K. Cellular mechanism of neuronal synchronization in epilepsy. *Science*  
745 **216**, 745–747 (1982).
- 746 58. Hodgkin, A. L. & Huxley, A. F. A quantitative description of membrane current and its application to  
747 conduction and excitation in nerve. *J. Physiol.* **117**, 500–544 (1952).
- 748 59. Paré, D., deCurtis, M. & Llinás, R. Role of the hippocampal-entorhinal loop in temporal lobe epilepsy:  
749 extra- and intracellular study in the isolated guinea pig brain in vitro. *J. Neurosci. Off. J. Soc. Neurosci.*  
750 **12**, 1867–1881 (1992).
- 751 60. Bukoski, A., Steyn-Ross, D. A. & Steyn-Ross, M. L. Channel-noise-induced critical slowing in the  
752 subthreshold Hodgkin-Huxley neuron. *Phys. Rev. E Stat. Nonlin. Soft Matter Phys.* **91**, 032708  
753 (2015).

- 754 61. Deshpande, S. S., Smith, G. A. & Van Drongelen, W. Third-order motifs are sufficient to fully and  
755 uniquely characterize spatiotemporal neural network activity. *Sci. Rep.* **13**, 238 (2023).
- 756 62. Schevon, C. A. *et al.* Multiscale recordings reveal the dynamic spatial structure of human seizures.  
757 *Neurobiol. Dis.* **127**, 303–311 (2019).
- 758 63. Shimoda, Y. *et al.* Extracellular glutamate and GABA transients at the transition from interictal spiking  
759 to seizures. *Brain* awad336 (2023) doi:10.1093/brain/awad336.
- 760 64. Dossi, E. & Huberfeld, G. GABAergic circuits drive focal seizures. *Neurobiol. Dis.* **180**, 106102 (2023).
- 761 65. Dubanet, O. *et al.* Probing the polarity of spontaneous perisomatic GABAergic synaptic transmission  
762 in the mouse CA3 circuit in vivo. *Cell Rep.* **36**, 109381 (2021).
- 763 66. Chen, L. *et al.* KCC2 downregulation facilitates epileptic seizures. *Sci. Rep.* **7**, 156 (2017).
- 764 67. Di Cristo, G., Awad, P. N., Hamidi, S. & Avoli, M. KCC2, epileptiform synchronization, and epileptic  
765 disorders. *Prog. Neurobiol.* **162**, 1–16 (2018).
- 766 68. Magloire, V., Cornford, J., Lieb, A., Kullmann, D. M. & Pavlov, I. KCC2 overexpression prevents the  
767 paradoxical seizure-promoting action of somatic inhibition. *Nat. Commun.* **10**, 1225 (2019).
- 768 69. Stead, M. *et al.* Microseizures and the spatiotemporal scales of human partial epilepsy. *Brain* **133**,  
769 2789–2797 (2010).
- 770 70. Wagner, F. B. *et al.* Microscale spatiotemporal dynamics during neocortical propagation of human  
771 focal seizures. *NeuroImage* **122**, 114–130 (2015).
- 772 71. Wang, Y. *et al.* Mechanisms underlying different onset patterns of focal seizures. *PLOS Comput. Biol.*  
773 **13**, e1005475 (2017).
- 774 72. Wenzel, M., Hamm, J. P., Peterka, D. S. & Yuste, R. Acute Focal Seizures Start As Local  
775 Synchronizations of Neuronal Ensembles. *J. Neurosci.* **39**, 8562–8575 (2019).
- 776 73. Karnani, M. M., Agetsuma, M. & Yuste, R. A blanket of inhibition: functional inferences from dense  
777 inhibitory connectivity. *Curr. Opin. Neurobiol.* **26**, 96–102 (2014).
- 778 74. Zhang, Z. J. *et al.* Transition to seizure: ictal discharge is preceded by exhausted presynaptic GABA  
779 release in the hippocampal CA3 region. *J. Neurosci.* **32**, 2499–2512 (2012).
- 780 75. Călin, A., Ilie, A. S. & Akerman, C. J. Disrupting Epileptiform Activity by Preventing Parvalbumin  
781 Interneuron Depolarization Block. *J. Neurosci.* **41**, 9452–9465 (2021).
- 782 76. Quian Quiroga, R., Nadasdy, Z. & Ben-Shaul, Y. Unsupervised Spike Detection and Sorting with  
783 Wavelets and Superparamagnetic Clustering. *Neural Comput.* **16**, 1661–1687 (2004).
- 784 77. Fee, M. S., Mitra, P. P. & Kleinfeld, D. Automatic sorting of multiple unit neuronal signals in the  
785 presence of anisotropic and non-Gaussian variability. *J. Neurosci. Methods* **69**, 175–188 (1996).
- 786 78. Hill, D. N., Mehta, S. B. & Kleinfeld, D. Quality metrics to accompany spike sorting of extracellular  
787 signals. *J. Neurosci.* **31**, 8699–8705 (2011).
- 788 79. Merricks, E. edmerix/SplitMerge: v1.0. Zenodo <https://doi.org/10.5281/zenodo.3951171> (2020).
- 789 80. Ardid, S. *et al.* Mapping of Functionally Characterized Cell Classes onto Canonical Circuit Operations  
790 in Primate Prefrontal Cortex. *J. Neurosci.* **35**, 2975–2991 (2015).
- 791 81. Petersen, P. C., Siegle, J. H., Steinmetz, N. A., Mahallati, S. & Buzsáki, G. CellExplorer: A framework  
792 for visualizing and characterizing single neurons. *Neuron* **109**, 3594–3608.e2 (2021).
- 793 82. Petersen, P. C. & Buzsáki, G. Cooling of Medial Septum Reveals Theta Phase Lag Coordination of  
794 Hippocampal Cell Assemblies. *Neuron* **107**, 731–744.e3 (2020).
- 795 83. Senzai, Y. & Buzsáki, G. Physiological Properties and Behavioral Correlates of Hippocampal Granule  
796 Cells and Mossy Cells. *Neuron* **93**, 691–704.e5 (2017).

- 797 84. Vajda, I. *et al.* Low-frequency stimulation induces stable transitions in stereotypical activity in cortical  
798 networks. *Biophys. J.* **94**, 5028–5039 (2008).
- 799 85. Berens, P. CircStat: a MATLAB toolbox for circular statistics. *J Stat Softw* (2009).
- 800 86. Lopes Da Silva, F. H., Vos, J. E., Mooibroek, J. & Van Rotterdam, A. Relative contributions of  
801 intracortical and thalamo-cortical processes in the generation of alpha rhythms, revealed by partial  
802 coherence analysis. *Electroencephalogr. Clin. Neurophysiol.* **50**, 449–456 (1980).
- 803 87. van Drongelen, W. *Signal Processing for Neuroscientists*. (Academic press, 2018).
- 804 88. Hodgkin, A. L. The local electric changes associated with repetitive action in a non-medullated axon.  
805 *J. Physiol.* **107**, 165–181 (1948).
- 806 89. Izhikevich, E. M. Which model to use for cortical spiking neurons? *IEEE Trans. Neural Netw.* **15**,  
807 1063–1070 (2004).
- 808 90. Clark, J. & Plonsey, R. The extracellular potential field of the single active nerve fiber in a volume  
809 conductor. *Biophys. J.* **8**, 842–864 (1968).
